# Functional variants in *NBS1* and cancer risk: evidence from a meta-analysis of 60 publications with 111 individual studies

Ping Gao, Ning Ma, Man Li<sup>1</sup>, Qing-Bao Tian<sup>1</sup> and Dian-Wu Liu<sup>1,\*</sup>

Department of Social Medicine and <sup>1</sup>Department of Epidemiology and Biostatistics, School of Public Health, Hebei Medical University, No. 361 Zhongshan East Road, Shijiazhuang 050017, Hebei Province, China

\*To whom correspondence should be addressed. Tel: +86 311 86265531; Fax: +86 311 86265531; Email: liudianwu1956@163.com

Received on June 16, 2013; revised on August 7, 2013; accepted on August 22, 2013

Several potentially functional variants of Nijmegen breakage syndrome 1 (*NBS1*) have been implicated in cancer risk, but individually studies showed inconclusive results. In this study, a meta-analysis based on 60 publications with a total of 39 731 cancer cases and 64 957 controls was performed. The multivariate method and the model-free method were adopted to determine the best genetic model. It was found that rs2735383 variant genotypes were associated with significantly increased overall risk of cancer under the recessive genetic model [odds ratio (OR) = 1.12, 95% confidence interval (CI): 1.02–1.22,  $P = 0.013$ ]. Similar results were found for rs1063054 under the dominant model effect (OR = 1.12, 95% CI: 1.01–1.23,  $P = 0.024$ ). The I171V mutation, 657del5 mutation and R215W mutation also contribute to the development of cancer (for I171V, OR = 3.93, 95% CI: 1.68–9.20,  $P = 0.002$ ; for 657del5, OR = 2.79, 95% CI: 2.17–3.68,  $P < 0.001$ ; for R215W, OR = 1.77, 95% CI: 1.07–2.91,  $P = 0.025$ ). From stratification analyses, an effect modification of cancer risks was found in the subgroups of tumour site and ethnicity for rs2735383, whereas the I171V, 657del5 and R215W showed a deleterious effect of cancer susceptibility in the subgroups of tumour site. However, rs1805794, D95N and P266L did not appear to have an effect on cancer risk. These results suggest that rs2735383, rs1063054, I171V, 657del5 and R215W are low-penetrance risk factors for cancer development.

## Introduction

DNA double-strand breaks (DSBs) are a relatively dangerous form of DNA lesion, unrepaired or defectively repaired chromosomal irregularities may lead to cell apoptosis and probably cancer (1). There are two different pathways in the repair of DSBs in human cells: homologous recombination (HR) repair and non-homologous end-joining (NHEJ) pathways (2,3). Nijmegen breakage syndrome 1 (*NBS1*) protein plays decisive roles in HR repair pathway as a component of the MRN [a protein complex consisting of meiotic recombination 11 homologue (MRE11), human RAD50 homologue (RAD50) and *NBS1*] complex. It modulates the DNA damage signal sensing by recruiting phosphatidylinositol 3-kinase-like kinase family members, ataxia telangiectasia mutated kinase, ataxia telangiectasia and Rad3-related kinase, and probably DNA-dependent protein catalytic subunit to the DNA damage sites and activates them. It can also recruit MRE11 and RAD50 to the

proximity of DSBs by an interaction with  $\gamma$ -H<sub>2</sub>AX through the forkhead-associated [breast cancer terminal domain (BRCT)] domain at its C-terminus (4).

The human *NBS1* gene contains 16 exons spanning over 50 kb on human chromosome 8q21, which is highly polymorphic. Previous studies have mainly focussed on eight common *NBS1* variants, including two nucleotide substitutions in the 3'-untranslated region (3'-UTR) (rs2735383, rs1063054), E185Q (glutamic acid to glutamine, G>C; rs1805794), a five nucleotide deletion/insertion (657del5), I171V (isoleucine to valine, A>G; rs61754966), R215W (arginine to glutamine, G>A; rs61753718), P266L (proline to leucine, C>T; rs769420), D95N (aspartic acid to asparagine, G>A; rs61753720), because they are probably to be functional. These variants may alter its structure or expression and consequently influence the interaction of the *NBS1* protein with other DSBs repair-related molecules.

Since reports of the association of *NBS1* variants with cancer susceptibility from individual studies are not consistent (5–7), and some recent meta-analysis analysed for an association between rs1805794 and several cancer types (8,9). In this study, the associations between eight functional variants (i.e. rs2735383, rs1063054, rs1805794, 657del5, I171V, R215W, D95N and P266L) and cancer risk were investigated.

## Materials and Methods

### Literature search strategy for identification of the studies

The relevant papers published before April 2013 were searched from the electronic databases Web of science, Embase, Medline, Chinese National Knowledge Infrastructure and China Biology Medicine disc. The search strategy for association between gene variants and cancer risk was used as follows: 'NBS1' or 'nibrin (NBN)', 'cancer', 'tumour' or 'carcinoma' and 'variant' or 'polymorphism'. No language limitations were used. Additional studies were identified via a manual review of the reference lists of identified studies and review articles.

Studies were included if they met the following inclusion criteria: (i) studies used a case-control study design, (ii) studies investigated the association between *NBS1* variants and cancer risk with genotyping data for at least one of eight variants, rs2735383, rs1063054, rs1805794, 657del5, I171V, R215W, D95N and P266L, (iii) abstracts, unpublished reports were not considered, (iv) there were sufficient results for extraction of data, i.e. number of subjects for each genotype in cancer and control groups. Two reviewers (P.G., M.L.) independently assessed eligible articles for inclusion. Disagreements were resolved by discussion.

### Data extraction

Data from each manuscript were extracted: author, year of publication, country of origin, ethnicity, cancer type, source of control groups (population-based, hospital-based or mixed controls), genotype method, the number of cases and controls and allele frequency. For studies including subjects of different ethnicities or countries, data were extracted separately.

### Statistical analysis

Crude odds ratios (ORs) with 95% confidence intervals (CIs) were calculated to estimate the strength of the association between respective *NBS1* variants and cancer risk.

For rs2735383, rs1063054 and rs1805794, data analyses were performed as follows. First, the goodness-of-fit chi-square test is used to test deviation from Hardy-Weinberg equilibrium for each study, and only in control groups.

Second, a  $Q$ -test for heterogeneity was performed separately for three ORs, i.e. CC vs. GG (OR<sub>1</sub>), CG vs. GG (OR<sub>2</sub>) and CC vs. CG (OR<sub>3</sub>) for rs2735383, rs1805794, and CC vs. AA (OR<sub>1</sub>), CA vs. AA (OR<sub>2</sub>) and CC vs. CA (OR<sub>3</sub>) for rs1063054. If heterogeneity was found in at least one of the three ORs, meta-regression model was used to explore the cause by fitting a covariable such as ethnicity, cancer type or source of control groups. If there was no heterogeneity, the fixed-effect model was used to determine the ORs and their 95% CIs; otherwise, the random-effect model was used to pool. If the overall gene effect was statistically significant, further comparisons of OR<sub>1</sub>, OR<sub>2</sub> and OR<sub>3</sub> were explored. These pairwise differences can be used to indicate the most appropriate genetic model as follows (10).

- (i) If  $OR_1 = OR_3 \neq 1$  and  $OR_2 = 1$ , then a recessive model is suggested.
- (ii) If  $OR_1 = OR_2 \neq 1$  and  $OR_3 = 1$ , then a dominant model is suggested.
- (iii) If  $OR_2 = 1/OR_3 = 1$  and  $OR_1 = 1$ , then a complete overdominant model is suggested.
- (iv) If  $OR_1 > OR_2 > 1$  and  $OR_1 > OR_3 > 1$  (or  $OR_1 < OR_2 < 1$  and  $OR_1 < OR_3 < 1$ ), then a codominant model is suggested.

Third, the gene effect was estimated by using the genetic model-free approach (11). This model is based on a simple reparameterization and uses the OR between the homozygous genotypes to capture the magnitude of the genetic effect, and lambda ( $\lambda$ ), the ratio of  $\log(OR_1)$  and  $\log(OR_2)$ , to capture the genetic mode of inheritance. The value of  $\lambda$  is not restricted, but values equal to 0, 0.5 and 1 correspond to the recessive, codominant and dominant genetic model, respectively, and values  $>1$  or  $<0$  would suggest overdominant genetic model. The two log ORs could be modelled as a fixed effect or as a random effect, as described in the second statistical analysis enumerated above.

Once the data have indicated the best genetic model, this model is used to collapse the three genotypes into two groups (except in the case of a codominant model), and the pooled gene effect is then estimated. Sensitivity analyses were performed by excluding studies not in Hardy–Weinberg equilibrium. Begger's funnel plots and the Egger's test were used to estimate publication bias (12).

For 657del5, I171V, R215W, D95N and P266L, because only one OR (carriers with missense alterations vs. non-carriers) was calculated, it is not necessary to determine the best genetic model. The statistic method was similar with that described in the previous paragraph. The meta-analysis was conducted using Stata software (version 12.0; StataCorp LP, College Station, TX, USA). A  $P$  value of  $<0.05$  was considered statistically significant. All the  $P$  values were two sided.

## Results

### Characteristics of studies

On the basis of the described search strategy, a total of 127 epidemiological studies after initial screening (as of April

2013) was found. Among these, 73 publications appeared to have met the inclusion criteria and were subjected to further examination. Thirteen studies were excluded because they were not case–control studies (13–21), letters to the editor (22,23) or variants not included in the eight variants (24,25). Finally, a total of 60 eligible publications (5–7,26–82) with 111 case–control studies met the present inclusion criteria (Figure 1 and Table I), in which 39 731 cases and 64 957 controls were included for the pooled analysis. All the studies were published in English except for three (80–82).

### Quantitative synthesis

NBS1 rs2735383. Thirteen eligible studies included 7561 cases and 8432 control subjects were analysed. The C allele frequency was 38.1% with 95% CI between 35.8 and 40.5%. Heterogeneity was checked for OR<sub>1</sub> (CC vs. GG), OR<sub>2</sub> (CG vs. GG) and OR<sub>3</sub> (CC vs. CG). Results indicated no heterogeneity for OR<sub>1</sub>, OR<sub>2</sub> or OR<sub>3</sub> (for OR<sub>1</sub>:  $\chi^2 = 20.49$ ,  $P = 0.058$ ; for OR<sub>2</sub>:  $\chi^2 = 11.36$ ,  $P = 0.499$ ; for OR<sub>3</sub>:  $\chi^2 = 11.44$ ,  $P = 0.492$ ). Hence, these studies were pooled by use of logistic regression with the fixed-effects model. The estimated OR<sub>1</sub>, OR<sub>2</sub> and OR<sub>3</sub> were 1.12 (95% CI: 1.02–1.23), 1.02 (95% CI: 0.95–1.09) and 1.11 (95% CI: 1.01–1.21). By using the genetic model-free approach, the estimated  $\lambda$  was 0.13 (95% CI:  $-0.56$  to 0.83), close to 0. These estimates suggest a recessive model effect of the C allele, and therefore GG and CG were combined and compared with CC (CC vs. CG+GG). The pooled OR was 1.12 (95% CI: 1.02–1.22,  $P = 0.013$ ),  $P = 0.170$  for heterogeneity (Figure 2).

Although there was no substantial between-study heterogeneity among the 13 studies, subgroup analysis was also carried out. Nine of 13 studies were conducted in Chinese, 1 in Caucasians and 3 in mixed population. Only the result for Chinese population was analysed, the OR was 1.14 (95% CI: 1.03–1.25,  $P = 0.009$ ),  $P = 0.067$  for heterogeneity. In order to avoid the result bias caused from multiple different cancers, the subgroup analysis was performed by cancer type, individuals with CC genotype had a significantly higher risk of lung cancer, the OR was 1.28 (95% CI: 1.21–1.46,  $P < 0.001$ ),

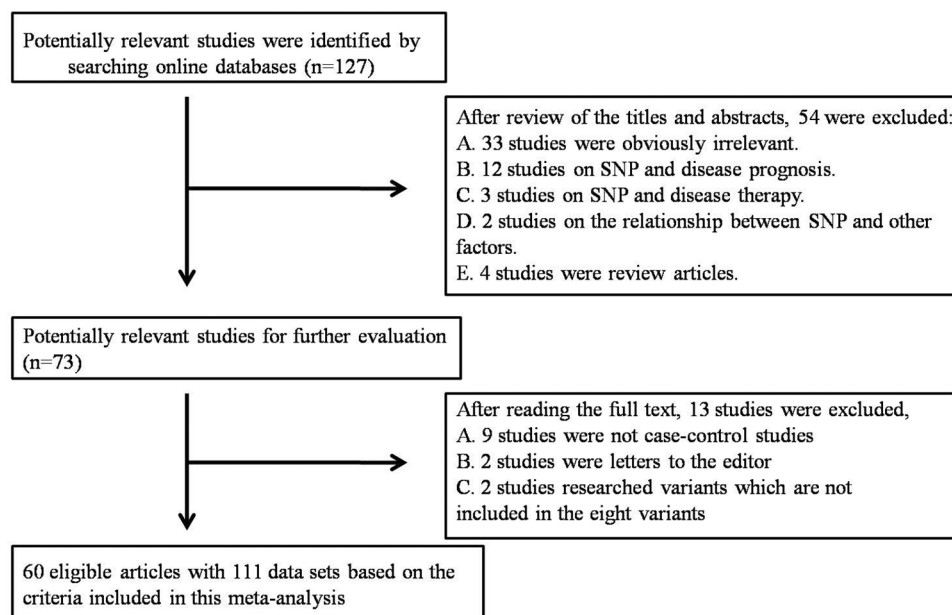

Fig. 1. Study flow chart for the process of selecting the final 60 publications.

**Table I.** Characteristics of studies included in the meta-analysis

| Author (year)                           | Publication year | Country  | Ethnicity | Cancer type              | Case control | Source of control | Genotype method                |
|-----------------------------------------|------------------|----------|-----------|--------------------------|--------------|-------------------|--------------------------------|
| rs2735383                               |                  |          |           |                          |              |                   |                                |
| Choudhury <i>et al.</i> (40)            | 2008             | UK       | Mixed     | Bladder cancer           | 736-770      | Mixed             | Taqman real-time PCR           |
| Fan <i>et al.</i> (82)                  | 2010             | China    | Chinese   | Lung cancer              | 575-575      | Population        | PCR-RFLP                       |
| Han <i>et al.</i> (74)                  | 2009             | USA      | Mixed     | Breast cancer            | 237-474      | Population        | Illumina                       |
| Huang <i>et al.</i> (27)                | 2011             | China    | Chinese   | Hepatocellular carcinoma | 865-900      | Population        | PCR-RFLP                       |
| Jiang <i>et al.</i> (30)                | 2010             | China    | Chinese   | ALL                      | 175-350      | Hospital          | PCR-RFLP                       |
| Li <i>et al.</i> (62)                   | 2013             | China    | Chinese   | Acute myeloid leukemia   | 428-600      | Hospital          | PCR-RFLP                       |
| Qiu <i>et al.</i> (81)                  | 2011             | China    | Chinese   | Lung cancer              | 781-781      | Population        | PCR-RFLP                       |
| Rollinson <i>et al.</i> (68)            | 2006             | UK       | Caucasian | Lymphoid malignancies    | 442-445      | Population        | Taqman real-time PCR           |
| Teo <i>et al.</i> (75)                  | 2011             | UK       | Mixed     | Bladder cancer           | 711-680      | Mixed             | Taqman real-time PCR           |
| Yang <sup>a</sup> <i>et al.</i> (26)    | 2012             | China    | Chinese   | Lung cancer              | 1056-1056    | Hospital          | PCR-RFLP                       |
| Yang <sup>b</sup> <i>et al.</i>         | 2012             | China    | Chinese   | Lung cancer              | 503-623      | Hospital          | PCR-RFLP                       |
| Zheng <sup>a</sup> <i>et al.</i> (28)   | 2011             | China    | Chinese   | Nasopharyngeal carcinoma | 700-758      | Hospital          | PCR-RFLP                       |
| Zheng <sup>b</sup> <i>et al.</i>        | 2011             | China    | Chinese   | Nasopharyngeal carcinoma | 352-400      | Hospital          | PCR-RFLP                       |
| rs1063054                               |                  |          |           |                          |              |                   |                                |
| Choudhury <i>et al.</i> (40)            | 2008             | UK       | Mixed     | Bladder cancer           | 743-783      | Mixed             | Taqman real-time PCR           |
| Park <sup>a</sup> <i>et al.</i> (32)    | 2010             | USA      | Mixed     | Lung cancer              | 539-918      | Population        | Taqman real-time PCR           |
| Park <sup>b</sup> <i>et al.</i>         | 2010             | USA      | Mixed     | UADT cancer              | 403-927      | Population        | Taqman real-time PCR           |
| Park <sup>c</sup> <i>et al.</i>         | 2010             | USA      | Mixed     | Oropharynx cancer        | 240-927      | Population        | Taqman real-time PCR           |
| Park <sup>d</sup> <i>et al.</i>         | 2010             | USA      | Mixed     | Laryngeal cancer         | 77-927       | Population        | Taqman real-time PCR           |
| Park <sup>e</sup> <i>et al.</i>         | 2010             | USA      | Mixed     | Bladder cancer           | 176-168      | Hospital          | Taqman real-time PCR           |
| Park <sup>f</sup> <i>et al.</i>         | 2010             | China    | Chinese   | Oesophagus cancer        | 201-382      | Population        | Taqman real-time PCR           |
| Park <sup>g</sup> <i>et al.</i>         | 2010             | China    | Chinese   | Stomach cancer           | 189-382      | Population        | Taqman real-time PCR           |
| Park <sup>h</sup> <i>et al.</i>         | 2010             | China    | Chinese   | Hepatocellular carcinoma | 189-382      | Population        | Taqman real-time PCR           |
| rs1805794                               |                  |          |           |                          |              |                   |                                |
| Auranen <sup>a</sup> <i>et al.</i> (47) | 2005             | UK       | Caucasian | Ovarian cancer           | 721-848      | Population        | Taqman real-time PCR           |
| Auranen <sup>b</sup> <i>et al.</i>      | 2005             | USA      | Caucasian | Ovarian cancer           | 308-383      | Population        | Taqman real-time PCR           |
| Auranen <sup>c</sup> <i>et al.</i>      | 2005             | Denmark  | Caucasian | Ovarian cancer           | 299-827      | Population        | Taqman real-time PCR           |
| Auranen <sup>d</sup> <i>et al.</i>      | 2005             | UK       | Caucasian | Ovarian cancer           | 258-734      | Population        | Taqman real-time PCR           |
| Bastos <i>et al.</i> (35)               | 2009             | Portugal | Caucasian | Thyroid cancer           | 109-217      | Hospital          | Taqman real-time PCR           |
| Broberg <i>et al.</i> (60)              | 2005             | Sweden   | Caucasian | Bladder cancer           | 61-154       | Population        | MALDI-TOF MS                   |
| Choudhury <i>et al.</i> (40)            | 2008             | UK       | Mixed     | Bladder cancer           | 748-788      | Mixed             | Taqman real-time PCR           |
| Desjardins <i>et al.</i> (37)           | 2009             | Canada   | Caucasian | Breast cancer            | 97-73        | Population        | PCR-SSCP and direct sequencing |
| Fan <i>et al.</i> (82)                  | 2010             | China    | Chinese   | Lung cancer              | 575-575      | Population        | PCR-RFLP                       |
| Festa <i>et al.</i> (49)                | 2005             | Sweden   | Caucasian | Basal cell carcinoma     | 241-574      | Hospital          | PCR-RFLP                       |
| Figueroa <i>et al.</i> (43)             | 2007             | USA      | Caucasian | Bladder cancer           | 1086-1020    | Hospital          | Taqman real-time PCR           |
| Gil <i>et al.</i> (29)                  | 2012             | Poland   | Caucasian | Colorectal cancer        | 133-100      | Hospital          | PCR-RFLP                       |
| Han <i>et al.</i> (74)                  | 2009             | USA      | Mixed     | Breast cancer            | 238-470      | Population        | Illumina                       |
| Hebbring <i>et al.</i> (45)             | 2006             | USA      | Caucasian | Prostate cancer          | 321-200      | Mixed             | Direct sequencing              |
| Huang <i>et al.</i> (27)                | 2011             | China    | Chinese   | Hepatocellular carcinoma | 865-900      | Population        | PCR-RFLP                       |
| Huang <i>et al.</i> (80)                | 2012             | China    | Chinese   | Hepatocellular carcinoma | 119-95       | Population        | PCR-SSCP                       |
| Jelonek <sup>a</sup> <i>et al.</i> (31) | 2010             | Poland   | Caucasian | Colon cancer             | 132-153      | Population        | PCR-RFLP                       |

Table I. *Continued*

| Author (year)                                       | Publication year | Country  | Ethnicity        | Cancer type              | Case control | Source of control | Genotype method                                 |
|-----------------------------------------------------|------------------|----------|------------------|--------------------------|--------------|-------------------|-------------------------------------------------|
| Jelonek <sup>b</sup> <i>et al.</i>                  | 2010             | Poland   | Caucasian        | Head and neck cancer     | 104-110      | Population        | PCR-RFLP                                        |
| Jelonek <sup>c</sup> <i>et al.</i>                  | 2010             | Poland   | Caucasian        | Breast cancer            | 93-425       | Population        | PCR-RFLP                                        |
| Jiang <i>et al.</i> (30)                            | 2010             | China    | Chinese          | ALL                      | 175-350      | Hospital          | PCR-RFLP                                        |
| Kuschel <i>et al.</i> (51)                          | 2002             | UK       | Caucasian        | Breast cancer            | 1694-734     | Population        | Taqman real-time PCR                            |
| Lan <i>et al.</i> (48)                              | 2005             | China    | Chinese          | Lung cancer              | 118-111      | Population        | Taqman real-time PCR                            |
| Li <i>et al.</i> (62)                               | 2013             | China    | Chinese          | Acute myeloid leukemia   | 428-600      | Hospital          | PCR-RFLP                                        |
| Loizidou <i>et al.</i> (36)                         | 2010             | Cyprus   | Caucasian        | Breast cancer            | 1104-1154    | Population        | MALDI-TOF MS                                    |
| Lu <i>et al.</i> (44)                               | 2006             | USA      | Caucasian        | Breast cancer            | 421-423      | Hospital          | PCR-RFLP                                        |
| Margulis <i>et al.</i> (38)                         | 2008             | USA      | Caucasian        | Renal cell carcinoma     | 322-333      | Population        | Taqman real-time PCR                            |
| Millikan <sup>a</sup> <i>et al.</i> (5)             | 2005             | USA      | African American | Breast cancer            | 766-681      | Population        | Taqman real-time PCR                            |
| Millikan <sup>b</sup> <i>et al.</i>                 | 2005             | USA      | Caucasian        | Breast cancer            | 1273-1136    | Population        | Direct sequencing                               |
| Mosor <i>et al.</i> (78)                            | 2008             | Poland   | Caucasian        | Lymphoid malignancies    | 157-275      | Population        | PCR-SSCP                                        |
| Pardini <i>et al.</i> (61)                          | 2008             | Czech    | Caucasian        | Colorectal cancer        | 532-530      | Hospital          | Taqman real-time PCR                            |
| Qiu <i>et al.</i> (81)                              | 2011             | China    | Chinese          | Lung cancer              | 781-781      | Population        | PCR-RFLP                                        |
| Sanyal <i>et al.</i> (50)                           | 2004             | Sweden   | Caucasian        | Bladder cancer           | 299-278      | Hospital          | Taqman real-time PCR                            |
| Silva <i>et al.</i> (33)                            | 2010             | Portugal | Caucasian        | Breast cancer            | 289-548      | Hospital          | Taqman real-time PCR                            |
| Smith <sup>a</sup> <i>et al.</i> (39)               | 2008             | USA      | Caucasian        | Breast cancer            | 318-407      | Hospital          | MALDI-TOF MS                                    |
| Smith <sup>b</sup> <i>et al.</i>                    | 2008             | USA      | African American | Breast cancer            | 53-74        | Hospital          | MALDI-TOF MS                                    |
| Thirumaran <i>et al.</i> (6)                        | 2006             | Germany  | Caucasian        | Basal cell carcinoma     | 529-533      | Hospital          | Taqman real-time PCR                            |
| Wu <i>et al.</i> (63)                               | 2006             | USA      | Mixed            | Bladder cancer           | 604-595      | Hospital          | Taqman real-time PCR                            |
| Zhang <i>et al.</i> (46)                            | 2005             | China    | Chinese          | Breast cancer            | 220-310      | Hospital          | PCR-RFLP                                        |
| Zheng <sup>a</sup> <i>et al.</i> (28)               | 2011             | China    | Chinese          | Nasopharyngeal carcinoma | 700-758      | Hospital          | PCR-RFLP                                        |
| Zheng <sup>b</sup> <i>et al.</i>                    | 2011             | China    | Chinese          | Nasopharyngeal carcinoma | 352-400      | Hospital          | PCR-RFLP                                        |
| Zienolddiny <i>et al.</i> (7)                       | 2006             | Norway   | Caucasian        | Lung cancer              | 310-376      | Hospital          | Taqman real-time PCR                            |
| Ziólkowska <i>et al.</i> (42)                       | 2007             | Poland   | Caucasian        | Laryngeal cancer         | 260-193      | Hospital          | PCR-RFLP and direct sequencing                  |
| I171V<br>Bogdanova <sup>a</sup> <i>et al.</i> (59)  | 2008             | Germany  | Caucasian        | Breast cancer            | 1048-1017    | Population        | PCR-RFLP and direct sequencing                  |
| Bogdanova <sup>b</sup> <i>et al.</i>                | 2008             | Belarus  | Caucasian        | Breast cancer            | 1636-1014    | Population        | PCR-RFLP and direct sequencing                  |
| Ciara <i>et al.</i> (34)                            | 2010             | Poland   | Caucasian        | Medulloblastoma          | 104-4227     | Population        | PCR-SSCP and direct sequencing                  |
| Desjardins <i>et al.</i> (37)                       | 2009             | Canada   | Caucasian        | Breast cancer            | 97-73        | Population        | PCR-SSCP and direct sequencing                  |
| Kanka <i>et al.</i> (71)                            | 2007             | Poland   | Caucasian        | Breast cancer            | 250-1300     | Population        | PCR-RFLP and direct sequencing                  |
| Mosor <i>et al.</i> (67)                            | 2006             | Poland   | Caucasian        | Lymphoid malignancies    | 135-500      | Population        | PCR-RFLP and direct sequencing                  |
| Nowak <i>et al.</i> (72)                            | 2008             | Poland   | Caucasian        | Mixed                    | 658-600      | Population        | PCR-RFLP and direct sequencing                  |
| Roznowski <i>et al.</i> (41)                        | 2008             | Poland   | Caucasian        | Breast cancer            | 270-500      | Population        | PCR-SSCP and direct sequencing                  |
| Varon <i>et al.</i> (69)                            | 2001             | Germany  | Caucasian        | Lymphoid malignancies    | 47-220       | Population        | PCR-SSCP and direct sequencing                  |
| Ziólkowska <i>et al.</i> (42)                       | 2007             | Poland   | Caucasian        | Laryngeal cancer         | 268-500      | Hospital          | PCR-RFLP and direct sequencing                  |
| 657del5<br>Piekutowska-Abramczuk <i>et al.</i> (73) | 2010             | Poland   | Caucasian        | Astrocytic tumours       | 127-12484    | Population        | PCR-SSCP                                        |
| Bogdanova <sup>a</sup> <i>et al.</i> (52)           | 2008             | Germany  | Caucasian        | Breast cancer            | 1232-1017    | Population        | Allele-specific PCR assay and direct sequencing |
| Bogdanova <sup>b</sup> <i>et al.</i>                | 2008             | Belarus  | Caucasian        | Breast cancer            | 1882-1014    | Population        | Allele-specific PCR assay and direct sequencing |

Table I. Continued

| Author (year)                                     | Publication year | Country | Ethnicity | Cancer type           | Case control | Source of control | Genotype method                                        |
|---------------------------------------------------|------------------|---------|-----------|-----------------------|--------------|-------------------|--------------------------------------------------------|
| Buslov <i>et al.</i> (57)                         | 2005             | Russia  | Caucasian | Breast cancer         | 873-692      | Population        | Allele-specific PCR assay and direct sequencing        |
| Carlomagno <i>et al.</i> (58)                     | 1999             | Germany | Caucasian | Breast cancer         | 477-866      | Population        | Allele-specific oligonucleotide hybridization assay    |
| Chrzanowska <i>et al.</i> (64)                    | 2006             | Poland  | Caucasian | Lymphoid malignancies | 545-6984     | Population        | PCR-SSCP and direct sequencing                         |
| Ciara <i>et al.</i> (34)                          | 2010             | Poland  | Caucasian | Medulloblastoma       | 104-12484    | Population        | PCR-SSCP and direct sequencing                         |
| Cybulski <i>et al.</i> (70)                       | 2004             | Poland  | Caucasian | Prostate cancer       | 396-1500     | Mixed             | Allele-specific PCR assay and direct sequencing        |
| Debniak <i>et al.</i> (76)                        | 2003             | Poland  | Caucasian | Malignant melanoma    | 80-530       | Population        | Allele-specific PCR assay and direct sequencing        |
| Górski <i>et al.</i> (55)                         | 2003             | Poland  | Caucasian | Breast cancer         | 230-530      | Population        | Allele-specific PCR assay and direct sequencing        |
| Górski <i>et al.</i> (56)                         | 2005             | Poland  | Caucasian | Breast cancer         | 2012-4000    | Population        | Allele-specific PCR assay and direct sequencing        |
| Hebbring <i>et al.</i> (45)                       | 2006             | USA     | Mixed     | Prostate cancer       | 3044-990     | Mixed             | Direct sequencing                                      |
| Kanka <i>et al.</i> (71)                          | 2007             | Poland  | Caucasian | Breast cancer         | 250-4000     | Population        | Allele-specific PCR assay and direct sequencing        |
| Mateju <i>et al.</i> (79)                         | 2012             | Czech   | Caucasian | Breast cancer         | 1303-915     | Population        | High-resolution melting analysis and direct sequencing |
| Mosor <i>et al.</i> (67)                          | 2006             | Poland  | Caucasian | Lymphoid malignancies | 135-195      | Population        | PCR-SSCP and direct sequencing                         |
| Resnick <i>et al.</i> (66)                        | 2003             | Russia  | Caucasian | Lymphoid malignancies | 68-548       | Population        | PCR-SSCP and direct sequencing                         |
| Roznowski <i>et al.</i> (41)                      | 2008             | Poland  | Caucasian | Breast cancer         | 270-500      | Population        | PCR-SSCP and direct sequencing                         |
| Soucek <i>et al.</i> (65)                         | 2003             | Czech   | Caucasian | Lymphoid malignancies | 119-177      | Population        | Multiplex PCR reaction and capillary electrophoresis   |
| Steffen <i>et al.</i> (54)                        | 2004             | Poland  | Caucasian | Mixed                 | 1289-1620    | Population        | PCR-SSCP and direct sequencing                         |
| Steffen <i>et al.</i> (53)                        | 2006             | Poland  | Caucasian | Breast cancer         | 562-1620     | Hospital          | DHPLC                                                  |
| Steffen <i>et al.</i> (77)                        | 2006             | Poland  | Caucasian | Lymphoid malignancies | 186-1620     | Population        | PCR-RFLP and direct sequencing                         |
| R215W<br>Piekutowska-Abramczuk <i>et al.</i> (73) | 2010             | Poland  | Caucasian | Astrocytic tumours    | 127-2815     | Population        | PCR-SSCP                                               |
| Bogdanova <sup>a</sup> <i>et al.</i> (52)         | 2008             | Germany | Caucasian | Breast cancer         | 1232-1017    | Population        | Allele-specific PCR assay and direct sequencing        |
| Bogdanova <sup>b</sup> <i>et al.</i>              | 2008             | Belarus | Caucasian | Breast cancer         | 1882-1014    | Population        | Allele-specific PCR assay and direct sequencing        |
| Desjardins <i>et al.</i> (37)                     | 2009             | Canada  | Caucasian | Breast cancer         | 97-73        | Population        | PCR-SSCP and direct sequencing                         |
| Hebbring <i>et al.</i> (45)                       | 2006             | USA     | Caucasian | Prostate cancer       | 477-319      | Mixed             | Direct sequencing                                      |
| Mateju <i>et al.</i> (79)                         | 2012             | Czech   | Caucasian | Breast cancer         | 1303-915     | Population        | High-resolution melting analysis and direct sequencing |
| Mosor <i>et al.</i> (67)                          | 2006             | Poland  | Caucasian | Lymphoid malignancies | 135-195      | Population        | PCR-SSCP and direct sequencing                         |
| Steffen <i>et al.</i> (54)                        | 2004             | Poland  | Caucasian | Mixed                 | 1289-1620    | Population        | PCR-SSCP and direct sequencing                         |
| Steffen <i>et al.</i> (77)                        | 2006             | Poland  | Caucasian | Lymphoid malignancies | 186-1620     | Population        | PCR-RFLP and direct sequencing                         |
| P266L<br>Choudhury <i>et al.</i> (40)             | 2008             | UK      | Mixed     | Bladder cancer        | 758-784      | Mixed             | Taqman real-time PCR                                   |
| Desjardins <i>et al.</i> (37)                     | 2009             | Canada  | Caucasian | Breast cancer         | 97-73        | Population        | PCR-SSCP and direct sequencing                         |

Table I. Continued

| Author (year)                  | Publication year | Country | Ethnicity | Cancer type           | Case control | Source of control | Genotype method                |
|--------------------------------|------------------|---------|-----------|-----------------------|--------------|-------------------|--------------------------------|
| D95N<br>Desjardins et al. (37) | 2009             | Canada  | Caucasian | Breast cancer         | 97-73        | Population        | PCR-SSCP and direct sequencing |
| Hebbring et al. (45)           | 2006             | USA     | Caucasian | Prostate cancer       | 3044-990     | Population        | Direct sequencing              |
| Mosor et al. (67)              | 2006             | Poland  | Caucasian | Lymphoid malignancies | 135-195      | Population        | PCR-SSCP and direct sequencing |
| Varon et al. (69)              | 2001             | Germany | Caucasian | Lymphoid malignancies | 47-110       | Population        | PCR-SSCP and direct sequencing |
| Ziółkowska et al. (42)         | 2007             | Poland  | Caucasian | Laryngeal cancer      | 268-195      | Hospital          | PCR-RFLP and direct sequencing |

a,b; a-c; a-d; a-h, Studies included more than one case-control study or involved different cancer types, when performed the meta-analysis they were divided as independent studies.

ALL, acute lymphoblastic leukemia; DHPLC, denaturing high-performance liquid chromatography; MALDI-TOF MS, matrix-assisted laser desorption/ionization time of flight mass spectrometry; PCR, polymerase chain reaction; PCR-SSCP, PCR-single-strand conformation polymorphism; RFLP, restriction fragment length polymorphism; UADT cancer, upper aerodigestive tract cancer.

$P = 0.343$  for heterogeneity. No significant association was found between this variant and bladder cancer (OR = 1.01, 95% CI: 0.79–1.30,  $P = 0.920$ ,  $P_{\text{het.}} = 0.419$ ), leukemia (OR = 0.93, 95% CI: 0.71–1.23,  $P = 0.622$ ,  $P_{\text{het.}} = 0.080$ ), nasopharyngeal cancer (OR = 0.94, 95% CI: 0.75–1.16,  $P = 0.550$ ,  $P_{\text{het.}} = 0.675$ ) and ‘other cancers’ (OR = 1.11, 95% CI: 0.91–1.35,  $P = 0.317$ ,  $P_{\text{het.}} = 0.786$ ) (Figure 2).

The frequency distributions of genotypes in control groups from all studies were in accordance with Hardy–Weinberg equilibrium ( $P > 0.05$ ), so the sensitivity analysis was not performed. To evaluate publication bias, the rs2735383 genotypes were plotted against the precision ones in a funnel plot, which is approximately symmetrical. Egger’s test suggested that there was no publication bias in the current meta-analysis ( $t = -1.49$ ,  $P = 0.165$ ) (Figure 3).

NBS1 rs1063054. Nine studies included 2757 cases and 5796 control subjects were analysed. The C allele frequency was 32.4% with 95% CI between 31.0 and 33.7%. Heterogeneity tests were negative for OR<sub>1</sub> (CC vs. AA,  $\chi^2 = 12.6$ ,  $P = 0.126$ ) and OR<sub>2</sub> (CA vs. AA,  $\chi^2 = 4.59$ ,  $P = 0.800$ ) but significant for OR<sub>3</sub> (CC vs. CA,  $\chi^2 = 18.15$ ,  $P = 0.020$ ). A number of factors was explored, including race and source of control groups, but the source of heterogeneity was not identified. We then pooled these studies by logistic regression with the random-effects model. The estimated OR<sub>1</sub>, OR<sub>2</sub> and OR<sub>3</sub> were 1.15 (95% CI: 1.01–1.36), 1.11 (95% CI: 1.01–1.23) and 1.00 (95% CI: 0.77–1.29), respectively. The estimated  $\lambda$  by the genetic model-free approach was 0.83 (95% CI: -0.72–2.38). This seems to indicate a dominant mode of effect, and therefore AC and CC were combined and compared with AA (AC+CC vs. AA). The pooled OR was 1.12 (95% CI: 1.01–1.23,  $P = 0.024$ ),  $P = 0.941$  for heterogeneity (Figure 2). All studies were confirmed to Hardy–Weinberg equilibrium ( $P > 0.05$ ). The shape of the funnel plot did not reveal any evidence of an obvious asymmetry. Moreover, the result of Egger’s test did not show any evidence of publication bias ( $t = 0.08$ ,  $P = 0.940$ ) (Figure 3).

NBS1 rs1805794. Forty-two studies included 18 901 cases and 21 430 control subjects were analysed. The pooled frequency of C allele was 36.6% with 95% CI between 34.0 and 39.2%. All studies were in accordance with Hardy–Weinberg equilibrium except two (38,80). Significant heterogeneity was observed for OR<sub>1</sub> (CC vs. GG,  $\chi^2 = 273.95$ ,

$P < 0.01$ ), OR<sub>2</sub> (CG vs. GG,  $\chi^2 = 79.77$ ,  $P < 0.01$ ) and OR<sub>3</sub> (CC vs. CG,  $\chi^2 = 164.96$ ,  $P < 0.01$ ). Race and cancer type were explored as a potential cause. However, heterogeneity was still present in Chinese (for OR<sub>1</sub>:  $\chi^2 = 142.30$ ,  $P < 0.01$ ; for OR<sub>2</sub>:  $\chi^2 = 28.37$ ,  $P < 0.01$ ; for OR<sub>3</sub>:  $\chi^2 = 75.74$ ,  $P < 0.01$ ) and Caucasians (for OR<sub>1</sub>:  $\chi^2 = 40.89$ ,  $P = 0.024$ ; for OR<sub>2</sub>:  $\chi^2 = 17.58$ ,  $P = 0.860$ ; for OR<sub>3</sub>:  $\chi^2 = 33.74$ ,  $P = 0.089$ ). The estimated  $\lambda$  was 2.99 (95% CI: -16.18 to 22.16). It was not suitable to calculate the ORs by race. In the subgroup analysis of cancer type, the variant genotypes had a non-significantly increased risk of cancer (OR = 1.10, 95% CI: 0.96–1.28,  $P = 0.053$ ,  $P_{\text{het.}} = 0.135$ ) as estimated in a dominant effect model in four lung cancer studies. In the three colorectal cancer studies, the variant genotypes had also a non-significantly increased risk (OR = 1.12, 95% CI: 0.92–1.36,  $P = 0.275$ ,  $P_{\text{het.}} = 0.784$ ) as estimated in an overdominant effect model. In the 12 breast cancer studies, 5 bladder cancer studies and 4 ovarian cancer studies, all of the estimated OR<sub>1</sub>, OR<sub>2</sub> and OR<sub>3</sub> were equal to 1, which suggest that there are no correlation between rs1805794 and cancer risks in these subgroups (Table II). No publication bias was detected by either the funnel plot or the Egger’s test ( $t = -1.06$ ,  $P = 0.334$ ) (Figure 3).

NBS1 I171V. Ten eligible studies included 4516 cases and 9951 controls were analysed, all of whom were Caucasians. Heterogeneity was detected among the 10 studies ( $\chi^2 = 31.89$ ,  $P < 0.01$ ). Consequently, the random-effects model was applied. In the overall analysis, I171V mutation was significantly associated with cancer risk (carriers vs. non-carriers: OR = 3.93, 95% CI: 1.68–9.20,  $P = 0.002$ ) (Figure 4).

In the subgroup analysis of tumour site, I171V mutation was associated with lymphoma risk (carriers vs. non-carriers: OR = 25.98, 95% CI: 4.57–147.77,  $P < 0.001$ ,  $P_{\text{het.}} = 0.641$ ) and ‘other cancers’ (carriers vs. non-carriers: OR = 7.70, 95% CI: 1.82–32.64,  $P < 0.001$ ,  $P_{\text{het.}} = 0.106$ ). No significant association was found between this variant and breast cancer (carriers vs. non-carriers: OR = 1.40, 95% CI: 0.69–2.38,  $P = 0.458$ ,  $P_{\text{het.}} = 0.120$ ) (Figure 4).

I171V mutation is causally associated with NBS and found particularly in individuals with Slavic populations (Polish, Czech and Ukrainian), so there is not an even distribution within different Caucasian populations. Of these 10 studies, 6 studies were conducted in Polish, 1 in French, 2 in German and 1 in Byelorussian. The results were analysed for Slavic populations

# A rs2735383

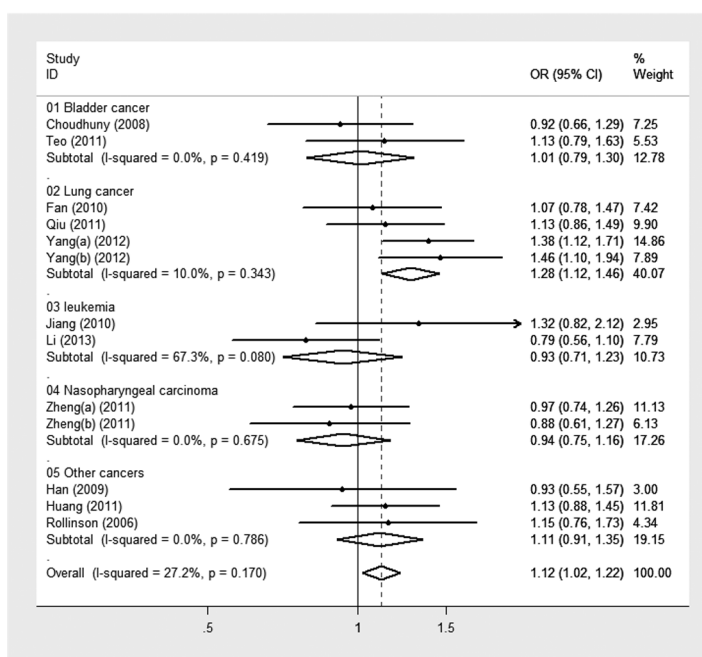

# B rs1063054

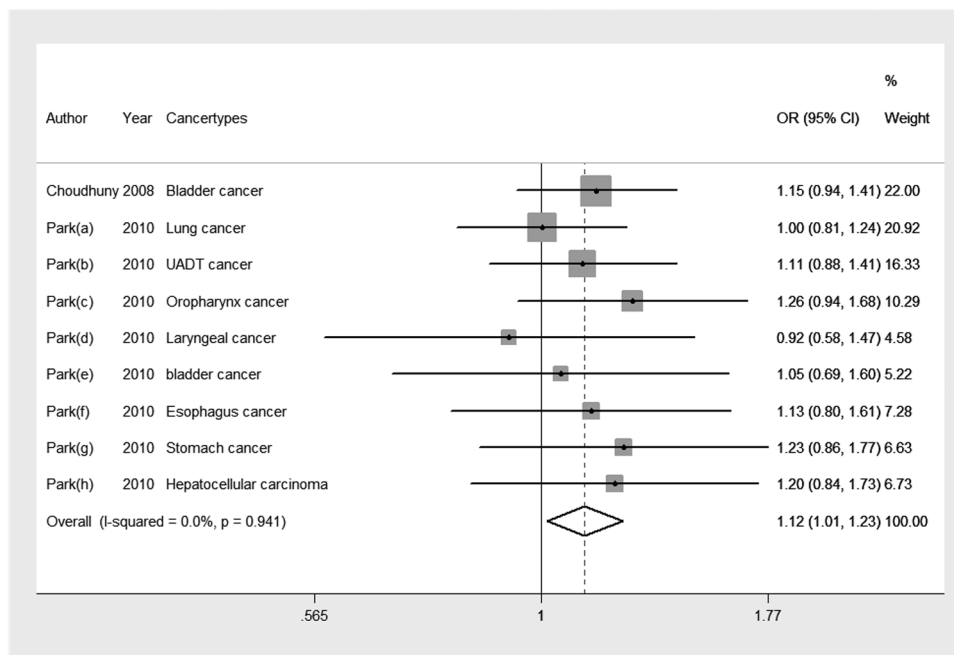

**Fig. 2.** Forest plots for the overall cancer risks associated with two *NBS1* variants. (A) rs2735383, the odds ratio was estimated under the recessive genetic model. (B) rs1063054, the odds ratio was estimated under the dominant genetic model.

and other Caucasian populations, respectively. The ORs were 5.93 (95% CI: 2.32–15.18,  $P < 0.001$ ,  $P_{het.} = 0.058$ ) and 1.70 (95% CI: 0.50–5.74,  $P = 0.394$ ,  $P_{het.} = 0.032$ ) for Slavic populations and other Caucasian populations, respectively. Publication bias was detected by the Egger’s test ( $t = 5.13$ ,  $P = 0.001$ ) (Figure 3).

*NBS1 657del5*. A total of 21 studies met the inclusion criteria, in which 15 184 cases and 54 081 controls were included. For the overall analysis, significant association between the risk of cancer and 657del5 mutation was found (carriers vs. non-carriers: OR = 2.79, 95% CI: 2.12–3.68,  $P < 0.001$ , by fixed effects;  $P = 0.609$  for heterogeneity) (Figure 4).

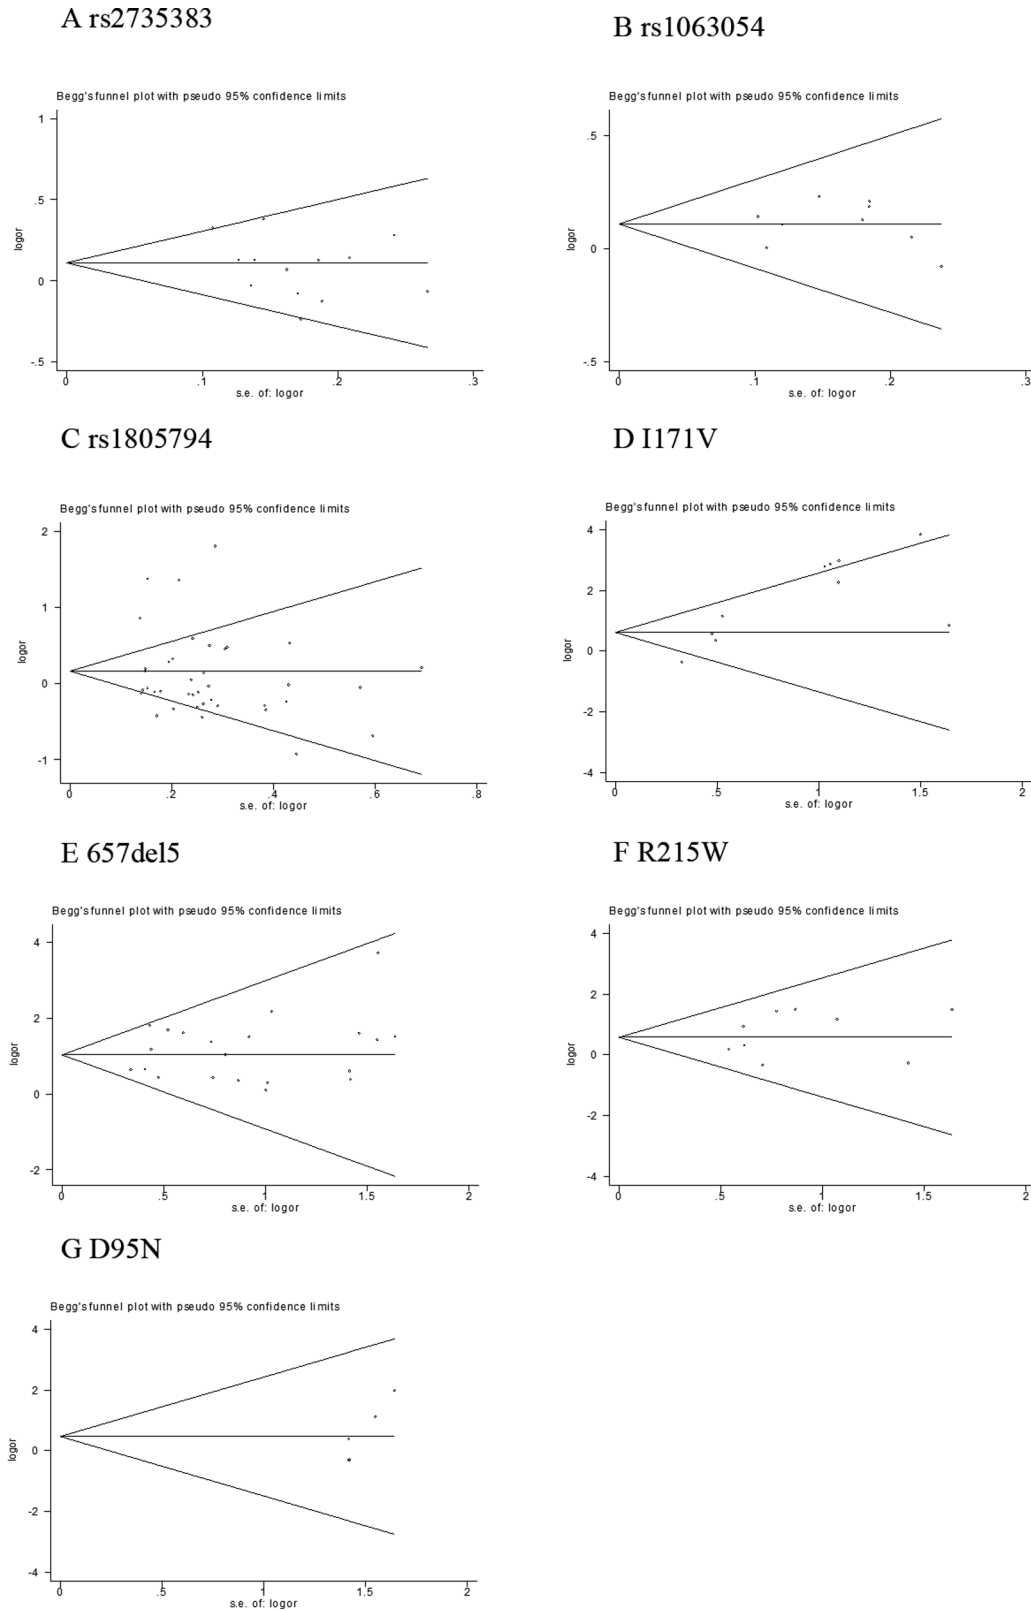

**Fig. 3.** Funnel plot analysis to detect publication bias for each of the *NBS1* variants. (A) rs2735383, (B) rs1063054, (C) rs1805794, (D) I171V, (E) 657del5, (F) R215W and (G) D95N. Each point represents an individual study for the indicated association.

In the stratified analysis of cancer type, significant risk was observed in breast cancer (carriers vs. non-carriers: OR = 2.51, 95% CI: 1.68–3.73,  $P < 0.001$ ,  $P_{\text{het.}} = 0.869$ ), lymphoma (carriers vs. non-carriers: OR = 2.93, 95% CI: 1.62–5.29,  $P < 0.001$ ,

$P_{\text{het.}} = 0.170$ ), prostate cancer (carriers vs. non-carriers: OR = 5.87, 95% CI: 2.51–13.75,  $P < 0.001$ ,  $P_{\text{het.}} = 0.883$ ) and ‘other cancers’ (carriers vs. non-carriers: OR = 2.29, 95% CI: 1.23–4.26,  $P = 0.009$ ,  $P_{\text{het.}} = 0.435$ ) (Figure 4).



**Table II.** Determination of the genetic effects of rs1805794 on cancers

| Genotype          | Case number | Control number | Multivariate method |            | Model-free approach |               |
|-------------------|-------------|----------------|---------------------|------------|---------------------|---------------|
|                   |             |                | OR                  | 95% CI     | $\lambda$           | 95% CI        |
| Caucasian         | 11 471      | 12 738         |                     |            | 2.99                | -16.18, 22.16 |
| CC vs. GG         |             |                | 1.04                | 0.92, 1.17 |                     |               |
| CG vs. GG         |             |                | 1.05                | 0.99, 1.11 |                     |               |
| CC vs. CG         |             |                | 0.97                | 0.87, 1.08 |                     |               |
| Chinese           | 4333        | 4880           |                     |            | 0.40                | 0.21, 0.59    |
| CC vs. GG         |             |                | 1.71                | 1.51, 1.93 |                     |               |
| CG vs. GG         |             |                | 1.24                | 1.12, 1.38 |                     |               |
| CC vs. CG         |             |                | 1.37                | 1.23, 1.53 |                     |               |
| Lung cancer       | 1784        | 1843           |                     |            | 0.86                | 0.21, 1.50    |
| CC vs. GG         |             |                | 1.34                | 1.11, 1.62 |                     |               |
| CG vs. GG         |             |                | 1.26                | 1.06, 1.48 |                     |               |
| CC vs. CG         |             |                | 1.03                | 0.88, 1.21 |                     |               |
| Colorectal cancer | 797         | 783            |                     |            | -0.18               | -1.01, 0.65   |
| CC vs. GG         |             |                | 0.75                | 0.54, 1.04 |                     |               |
| CG vs. GG         |             |                | 1.05                | 0.85, 1.30 |                     |               |
| CC vs. CG         |             |                | 0.72                | 0.52, 0.99 |                     |               |
| Ovarian cancer    | 1586        | 2792           |                     |            | 0.02                | -0.78, 0.81   |
| CC vs. GG         |             |                | 0.85                | 0.69, 1.05 |                     |               |
| CG vs. GG         |             |                | 1.00                | 0.87, 1.14 |                     |               |
| CC vs. CG         |             |                | 0.85                | 0.69, 1.05 |                     |               |
| Breast cancer     | 6566        | 6435           |                     |            | -2.12               | -24.97, 20.73 |
| CC vs. GG         |             |                | 0.98                | 0.86, 1.11 |                     |               |
| CG vs. GG         |             |                | 1.04                | 0.96, 1.13 |                     |               |
| CC vs. CG         |             |                | 0.95                | 0.85, 1.08 |                     |               |
| Bladder cancer    | 2798        | 9270           |                     |            | 0.84                | -0.57, 2.25   |
| CC vs. GG         |             |                | 1.15                | 0.96, 1.37 |                     |               |
| CG vs. GG         |             |                | 1.13                | 1.01, 1.26 |                     |               |
| CC vs. CG         |             |                | 1.01                | 0.76, 1.35 |                     |               |

657del5 mutation is associated with NBS and also found particularly in Slavic populations. Of these 21 studies, 13 studies were conducted in Polish, 1 in Czech, 2 in German, 1 in Byelorussian, 2 in Russian and 2 in mixed Caucasian. The ORs were 2.51 (95% CI: 1.87–3.36,  $P < 0.001$ ,  $P_{\text{het.}} = 0.440$ ) and 5.21 (95% CI: 1.95–13.95,  $P = 0.001$ ,  $P_{\text{het.}} = 0.525$ ) for Slavic populations and other Caucasian populations, respectively. The results did not show any evidence of publication bias ( $t = 0.77$ ,  $P = 0.453$ ) (Figure 3).

NBS1 R215W. Nine studies included 6728 cases and 9588 controls were pooled to analyse. In total, the summary OR for all the studies was 1.77 (95% CI: 1.07–2.91,  $P = 0.025$ ,  $P_{\text{het.}} = 0.641$ ) (Figure 5). It was shown that the R215W mutation was related to susceptibility to all cancers.

In the stratified analysis of cancer type, no significant risk was observed in breast cancer (carriers vs. non-carriers: OR = 1.44, 95% CI: 0.73–2.85,  $P = 0.294$ ,  $P_{\text{het.}} = 0.357$ ). Interestingly, statistically significantly ascending cancer risk was observed in ‘other cancers’ (carriers vs. non-carriers: OR = 2.24, 95% CI: 1.09–4.60,  $P = 0.029$ ,  $P_{\text{het.}} = 0.809$ ) (Figure 5).

All of the studies were conducted in Caucasians. R215W mutation is also associated with NBS and found particularly in Slavic populations. Of these 9 studies, 4 studies were conducted in Polish, 1 in Czech, 1 in Byelorussian, 1 in French, 1 in German and 1 in mixed Caucasian. The ORs were 1.94 (95% CI: 0.93–4.06,  $P = 0.080$ ,  $P_{\text{het.}} = 0.465$ ) and 1.80 (95% CI: 0.80–4.02,  $P = 0.154$ ,  $P_{\text{het.}} = 0.344$ ) for Slavic populations and other Caucasian populations, respectively. Finally, Begger’s funnel plot and Egger’s test showed that publication bias was not significant ( $t = 0.83$ ,  $P = 0.431$ ) (Figure 3).

NBS1 D95N and P266L. The association between D95N mutation and cancer risk was investigated in five studies with a total of 1281 cases and 1011 controls. All of the studies were conducted in Caucasians. In the overall analysis, no significant association was observed (carriers vs. non-carriers: OR = 1.69, 95% CI: 0.49–5.81,  $P = 0.404$ ,  $P_{\text{het.}} = 0.805$ ) (Figure 5). Source of controls in all studies was population based except for one (42), the result was similar with that of the overall population (carriers vs. non-carriers: OR = 2.08, 95% CI: 0.51–8.44,  $P = 0.306$ ,  $P_{\text{het.}} = 0.747$ ). Publication bias was found by Begger’s funnel plot and Egger’s test ( $t = 5.16$ ,  $P = 0.014$ ) (Figure 3). Only two studies were included for the analysis between P266L mutation and cancer risk, the result suggested that there was no correlation (OR = 1.31, 95% CI: 0.25–6.77,  $P = 0.745$ ,  $P_{\text{het.}} = 0.679$ ). Further subgroup analyses were not performed because of limited data for this variant.

## Discussion

In this meta-analysis, including a total of 39 731 cancer cases and 64 957 controls from 60 independent publications, the associations of eight well-characterised variants (rs2735383, rs1063054, rs1805794, I171V, 657del5, R215W, P266L and D95N) of the NBS1 gene with cancer risk were examined. It was demonstrated that the carriers of rs2735383, rs1063054, I171V, 657del5 and R215W variant genotypes were associated with a significant increase in overall cancer risks, whereas the others did not appear to have an influence on cancer susceptibility. From stratification analyses, an effect modification of cancer risks was found in the subgroups of tumour site and ethnicity for rs2735383, whereas the I171V, 657del5 and R215W showed a deleterious effect of cancer susceptibility in the subgroups of tumour site.

# A I171V

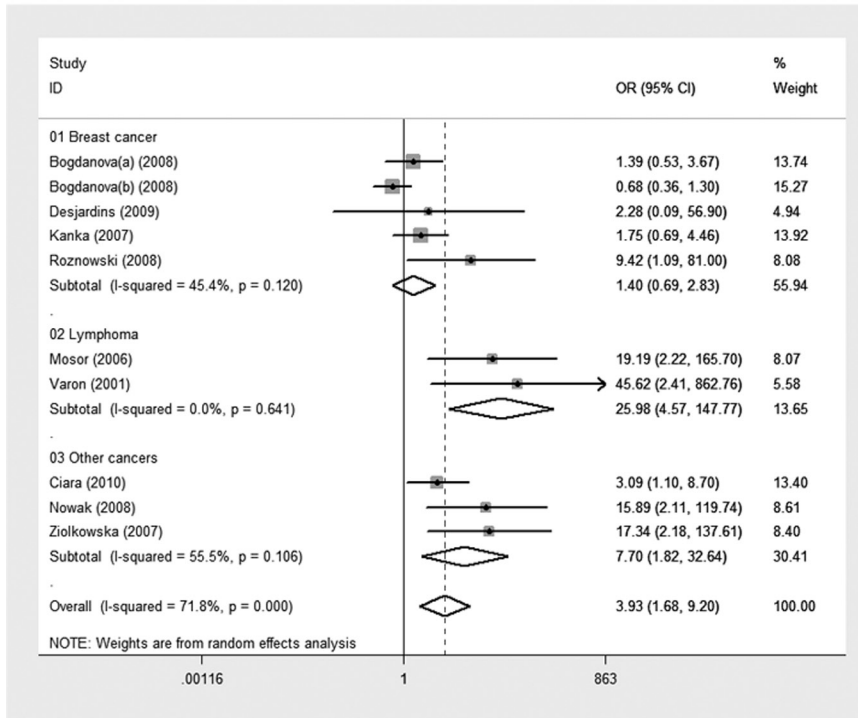

# B 657del5

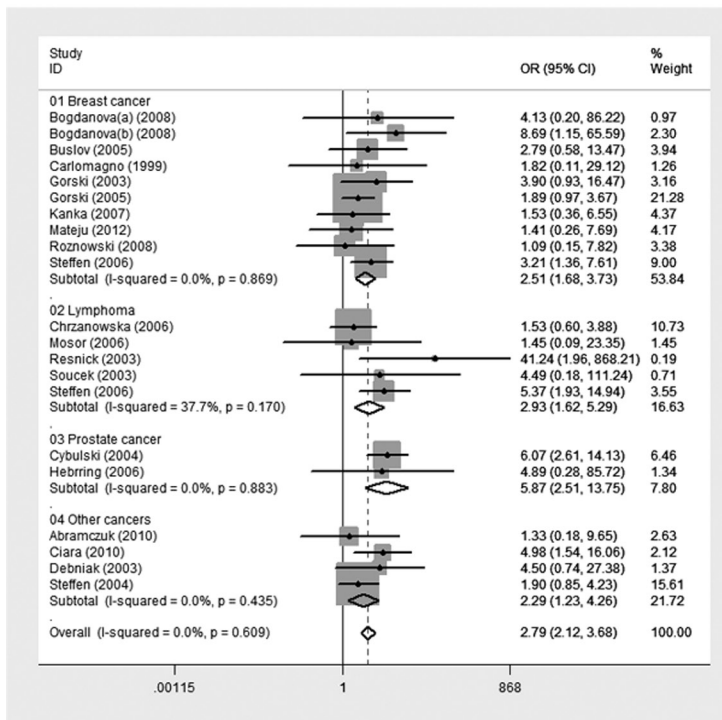

Fig. 4. Forest plots for the overall cancer risks associated with two *NBSI* variants. (A) I171V and (B) 657del5.

## A R215W

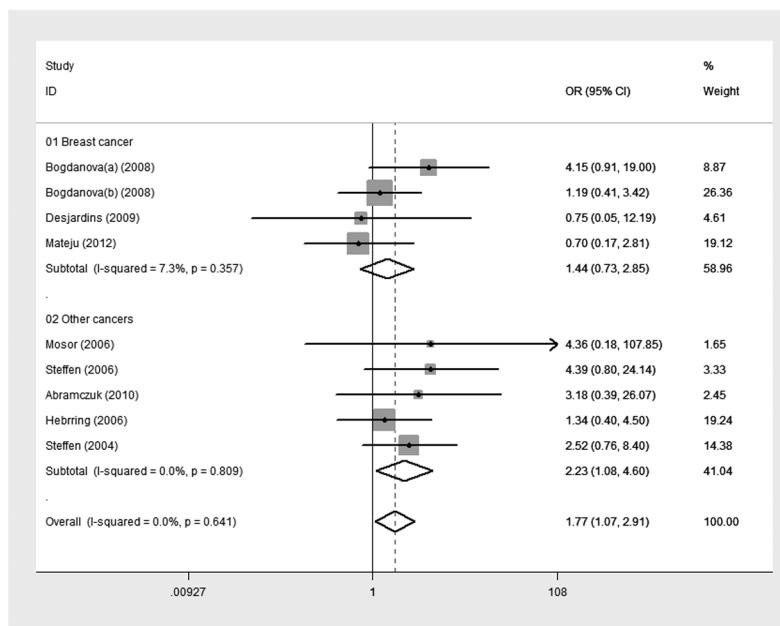

## B D95N

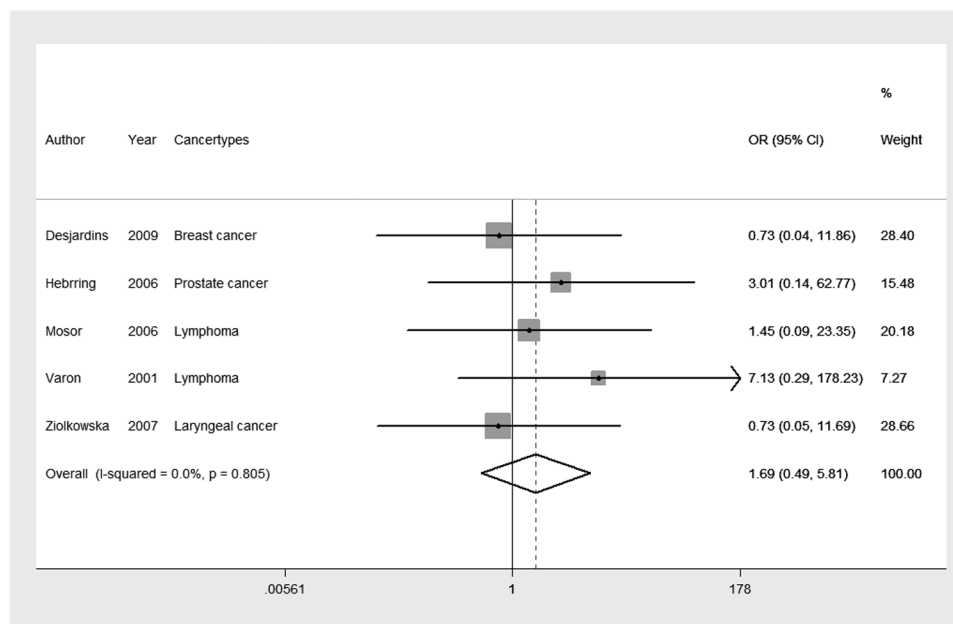

Fig. 5. Forest plots for the overall cancer risks associated with two *NBSI* variants. (A) R215W and (B) D95N.

Most meta-analyses of genetic association studies were done by assuming a specific genetic model. For example, a polymorphism has two alleles (G and g), the allele of G is thought to be associated with a disease, association studies will usually collect information on the numbers of diseased and non-diseased subjects with each of the three genotypes (gg, Gg and GG). Actually, if genotypes were compared by assuming a special genetic model (e.g. dominant model, recessive model and so on), the conclusion will be sensitive to the assumed

genetic model (83). When unsure about the genetic model, some researchers fit multiple models and/or perform pairwise comparisons. However, adjustment for multiple testing is rarely made. The OR of GG vs. gg and the OR of Gg vs. gg are usually obtained by carrying out two separate meta-analyses, but ignoring the correlation between the two ORs induced by the same population (the carriers of gg genotype), thus increasing the probability of making type I error. Several studies indicated that if 5 independent significant tests in 4 genetic models were

made, the false-positive rate will be increased to 0.23 (using 0.05 as the critical significance level in each separate test) (84–86). Minelli's result suggested that adopting the wrong genetic model can lead to erroneous pooled estimates with deceptively high precision by given five meta-analysis examples (11).

Thus, Thakkinstian *et al.* (10) presented a method to determine the best genetic method by comparing  $OR_1$  (GG vs. gg),  $OR_2$  (Gg vs. gg) and  $OR_3$  (GG vs. Gg). The detailed method can be found in the reference (10). Besides, Minelli *et al.* (11) suggested a genetic model-free approach to the meta-analysis, which does not assume the mode of inheritance. The underlying genetic model is estimated from the original data. The model is based on a simple reparameterization and use the parameter of  $\lambda$  ( $\log OR_{Gg}/\log OR_{GG}$ ) to determine the mode of inheritance. Details of this model are given in the reference (11). In this study, the two methods mentioned above were combined to systematically review the association between functional *NBS1* variants and cancer risks. Hence, the association between rs2735383 and cancer risk was investigated under the recessive model of effect. The relationship between rs1063054 and cancer risk was investigated under the dominant model of effect.

As a component of the MRN complex, *NBS1* plays an important role in cellular response to DNA damage and the maintenance of chromosomal integrity (30). Previous studies have proved that NBN is a protein with both caretaker and gatekeeper functions in the prevention of tumourigenesis (87–89). The present meta-analysis supports a significant impact of *NBS1* variants on overall cancer risks, particularly in rs2735383, rs1063054, I171V, 657del5 and R215W. The rs2735383 is located at the 3'-UTR of *NBS1*. Single-nucleotide polymorphisms (SNPs) in 3'-UTR region may disrupt or create a microRNA (miRNA) binding site so as to repress translation or destabilise mRNA. Bioinformatics analysis revealed that the rs2735383 variant locates at the binding site of three miRNAs (hsa-miR-629, hsa-miR-499-5p and hsa-miR-509-5p). Yang *et al.* (26) revealed that the rs2735383C allele had a lower transcription activity than G allele, and the hsa-miR-629 but not the other two miRNAs had effect on modulation of *NBS1* gene *in vitro* by luciferase assay in lung cancer. Zheng *et al.* (28) also revealed that the rs2735383C allele had a lower transcription activity than G allele in nasopharyngeal carcinoma, but its function was modulated by hsa-miR-509-5p rather than hsa-miR-629. As for rs1063054, its biological functions have not yet been clarified, but it is also located at the 3'-UTR of *NBS1*. It is predicted that rs1063054 may be combined with hsa-miR-1178, hsa-miR-513a-3p, hsa-miR-654-3p or hsa-miR-657. The exact binding miRNAs need to be validated by functional tests. I171V variant is a transition A>G in 511 position. The consequence of this missense mutation is an exchange of isoleucine for valine in position 171 of NBN. The effect of I171V mutation is a change in this protein's structure. One of its N-terminal domains BRCT is affected (4). The BRCT domain is responsible for a proper interaction with other proteins in DNA repair and cell cycle regulation. Our results indicated that carriers who had the I171V variant were about 293% more likely to have cancers than were non-carriers. 657del5 variant is the most common hypomorphic variant in the *NBS1* gene, which results in two alternative forms of the NBN protein with a lower molecular weight of ~26 and 70 kDa. In particular, the 5-bp deletion in position 657 splits the BRCT tandem domain exactly in the linker region that connects the two BRCT domains. Null mutation is embryonically lethal in the mouse (90). Murine B cells with a conditional null mutation

had defective G2/M-phase and intra-S-phase checkpoints (91). Carriers who had the 657del5 variant were about 179% more likely to have cancers than were non-carriers. Significant results were also found in breast cancer and lymphoma subgroups. Zhang *et al.* (92) researched the relationship between 657del5 and breast cancer risk, the pooled OR was 2.63-fold of the referenced genotype, which was similar with the result of this meta-analysis. The R215W mutation in *NBS1* impairs histone  $\gamma$ -H<sub>2</sub>AX binding after induction of DNA damage, leading to a delay in DNA-DSB rejoining. Molecular modelling (93) reveals that the 215 residue is located between the two BRCT domains, affecting their relative orientation that appears critical for  $\gamma$ -H<sub>2</sub>AX binding. The result of this study indicated that the R215W mutation is a risk factor for cancers. Meanwhile, it is noteworthy that statistically increased risk was observed in 'other cancers', which was combined with a number of single studies with different cancer types, implying that significant association may really exist.

As for rs1805794, it is a non-synonymous mutation, which causes the change of 185 Glu to Gln. The amino acid alteration caused by rs1805794 may possibly change the function of NBN, and then probably change the protein-protein interaction of *NBS1* and other BRCA1. A recent research analysed for the association between rs1805794 and cancer risk (8). Their research included 16 studies and was done by assuming a genetic model. Their result indicated that the carriers of variant genotypes had a 1.06-fold elevated risk of cancer in a dominant model. However, the association was not found in an additive model nor in a recessive model. And they did not find associations in the subgroup of cancer type. In this meta-analysis, we adopted the multivariate method and the model-free method to determine the best genetic model. Because significant heterogeneity was observed for  $OR_1$ ,  $OR_2$ ,  $OR_3$  and  $\lambda$ , it was not suitable to pool estimates in all of the studies. In the subgroup analysis of cancer type, the association was estimated under the dominant effect model in those lung cancer studies. In the colorectal cancer studies, the association was estimated under the overdominant effect model. This model is also called molecular heterosis. Molecular heterosis occurs when subjects heterozygous for a specific genetic polymorphism show a significantly greater effect (positive heterosis) or lesser effect (negative heterosis) than subjects homozygous for either allele. At a molecular level, heterosis appears counterintuitive, but a review indicates that this model is perhaps more common than we thought and cites many examples (94). Indeed, the SNP Leu432Val in *CYP1B1* gene has been associated with bladder cancer, and this also seems to observe a pattern of overdominant (95). The mechanism of molecular heterosis may include the following. First, the range of expression of gene products on different cells is greater in heterozygotes than in homozygotes. The second possibility is the inverted U effect, i.e. heterozygotes show optimal performance than homozygotes. Third, heterozygotes have advantages in having variation in a multimeric protein, such as better  $V_{max}$ . In the breast cancer studies, bladder cancer studies and ovarian cancer studies, all of the three ORs were equal to 1, which suggested there were no substantial associations between rs1805794 and cancer risks in these subgroups.

In the subgroup analysis, elevated risk was pronounced among breast cancer by I171V and 657del5. A common thread linking the main risks for developing breast cancer in women is cumulative, excessive exposure to oestrogen (96). The suggested mechanism is that oestrogen metabolites (i.e. CE-Qs)

bind to DNA, leading to the formation of depurinating adducts and resulting in DSB formation. Breast cells that have lost DSB-related checkpoint/repair due to the harbouring of at-risk genotypes have a growth advantage over DSB checkpoint/repair-proficient cells, resulting in an increased risk of developing breast cancer (97). Tobacco smoke is a well-characterised risk factor for lung cancer. In the subgroup analysis of lung cancer, elevated risk was only found in rs2735383, but not in rs1805794. In spite of this, some researchers (20) indicated that the rs1805794 variant could affect repair of DNA adducts and would allow the accumulation of G→T or C→A transversions in *p53*. Previous studies have reported that *p53* mutations accumulate in lung tumours with high levels of chromosomal abnormalities (98,99), suggesting that *p53* mutations may prevent the efficient repair of the chromosomal alterations caused by tobacco carcinogens. rs1805794 associates with *p53* mutations in lung cancer, suggesting that it may contribute to human lung carcinogenesis in smokers. The non-significant result in our meta-analysis may be due to limited included studies, further investigations are required to validate the result of the present meta-analysis.

This is the first and the most comprehensive meta-analysis undertaken so far for quantitative analyses between *NBS1* variants and the risk of cancer. However, in interpreting the results of the current meta-analysis, some limitations need to be addressed. Firstly, most of the studies were conducted in Caucasian and Asian populations. Therefore, our results may be applicable only to these ethnic groups. Secondly, publication biases were found for I171V and D95N. For these variants, no published data were available for Asian populations, probably because these variants are rare in Asian populations. Thirdly, this meta-analysis was based on unadjusted evaluation, because not all published studies presented adjusted ORs or when they did, the ORs were not adjusted by the same potential confounders. Meanwhile, original data shortage limited our further evaluation of potential gene–environment interactions. Fourthly, our meta-analysis investigated the association between *NBS1* variants and all cancer risk. However, the HR repair pathway is not necessarily expected to be relevant in the carcinogenesis of certain cancers, such as basal cell carcinoma and melanoma, where the nucleotide excision repair would be expected to play a bigger role. The heterogeneity of the cancer types included thus reduces the paper's overall practical relevance to identify clinically useful genetic risk variants. We did calculate the summary ORs without studies of these cancer types. There were no substantial changes in the pooled ORs with or without these studies. In spite of these, our meta-analysis still has some advantages. On one hand, we adopted the multivariate method and the model-free method to determine the best genetic model, rather than assuming a specific genetic model, thereby decreasing the probability of making type I error. On the other hand, no substantial heterogeneities were found for rs2735383, rs1063054, 657del5, R215W, D95N and P266L. For rs1805794, instead of pooling the ORs in all studies directly, we explored the cause of heterogeneity and estimated ORs in subgroups when heterogeneity was eliminated. Merging studies with great heterogeneity can be very misleading (100). Besides, the subject number of >100 000 in the published studies is sufficient for a comprehensive analysis.

In summary, this meta-analysis supports an association between minor variants of rs2735383, rs1063054, I171V, 657del5 and R215W and elevated cancer risks. rs1805794, D95N and P266L were not associated with cancer

susceptibility. Further studies with large sample sizes and tissue-specific biological characterization are required to confirm current findings.

## Funding

Hebei Health Department Fund of China (20090004, GL2012059).

Conflict of interest statement: None declared.

## References

1. Khanna, K. K. and Jackson, S. P. (2001) DNA double-strand breaks: signaling, repair and the cancer connection. *Nat. Genet.*, **27**, 247–254.
2. Dasika, G. K., Lin, S. C., Zhao, S., Sung, P., Tomkinson, A. and Lee, E. Y. (1999) DNA damage-induced cell cycle checkpoints and DNA strand break repair in development and tumorigenesis. *Oncogene*, **18**, 7883–7899.
3. Ferguson, D. O. and Alt, F. W. (2001) DNA double strand break repair and chromosomal translocation: lessons from animal models. *Oncogene*, **20**, 5572–5579.
4. Zhang, Y., Zhou, J. and Lim, C. U. (2006) The role of NBS1 in DNA double strand break repair, telomere stability, and cell cycle checkpoint control. *Cell Res.*, **16**, 45–54.
5. Millikan, R. C., Player, J. S., Decotret, A. R., Tse, C. K. and Keku, T. (2005) Polymorphisms in DNA repair genes, medical exposure to ionizing radiation, and breast cancer risk. *Cancer Epidemiol. Biomarkers Prev.*, **14**, 2326–2334.
6. Thirumaran, R. K., Bermejo, J. L., Rudnai, P., *et al.* (2006) Single nucleotide polymorphisms in DNA repair genes and basal cell carcinoma of skin. *Carcinogenesis*, **27**, 1676–1681.
7. Zienolddiny, S., Campa, D., Lind, H., Ryberg, D., Skaug, V., Stangeland, L., Phillips, D. H., Canzian, F. and Haugen, A. (2006) Polymorphisms of DNA repair genes and risk of non-small cell lung cancer. *Carcinogenesis*, **27**, 560–567.
8. Lu, M., Lu, J., Yang, X., Yang, M., Tan, H., Yun, B. and Shi, L. (2009) Association between the NBS1 E185Q polymorphism and cancer risk: a meta-analysis. *BMC Cancer*, **9**, 124.
9. Yao, F., Fang, Y., Chen, B., Jin, F. and Wang, S. (2013) Association between the NBS1 Glu185Gln polymorphism and breast cancer risk: a meta-analysis. *Tumour Biol.*, **34**, 1255–1262.
10. Thakkinstian, A., McElduff, P., D'Este, C., Duffy, D. and Attia, J. (2005) A method for meta-analysis of molecular association studies. *Stat. Med.*, **24**, 1291–1306.
11. Minelli, C., Thompson, J. R., Abrams, K. R., Thakkinstian, A. and Attia, J. (2005) The choice of a genetic model in the meta-analysis of molecular association studies. *Int. J. Epidemiol.*, **34**, 1319–1328.
12. Egger, M., Davey Smith, G., Schneider, M. and Minder, C. (1997) Bias in meta-analysis detected by a simple, graphical test. *BMJ*, **315**, 629–634.
13. Popanda, O., Tan, X. L., Ambrosone, C. B., *et al.* (2006) Genetic polymorphisms in the DNA double-strand break repair genes XRCC3, XRCC2, and NBS1 are not associated with acute side effects of radiotherapy in breast cancer patients. *Cancer Epidemiol. Biomarkers Prev.*, **15**, 1048–1050.
14. Stanulla, M., Stümm, M., Dieckvoss, B. O., Seidemann, K., Schemmel, V., Müller Brechlin, A., Schrappe, M., Welte, K. and Reiter, A. (2000) No evidence for a major role of heterozygous deletion 657del5 within the NBS1 gene in the pathogenesis of non-Hodgkin's lymphoma of childhood and adolescence. *Br. J. Haematol.*, **109**, 117–120.
15. Sokolenko, A. P., Rozanov, M. E., Mitiushkina, N. V., *et al.* (2007) Founder mutations in early-onset, familial and bilateral breast cancer patients from Russia. *Fam. Cancer*, **6**, 281–286.
16. Huang, J., Grotzer, M. A., Watanabe, T., Hewer, E., Pietsch, T., Rutkowski, S. and Ohgaki, H. (2008) Mutations in the Nijmegen breakage syndrome gene in medulloblastomas. *Clin. Cancer Res.*, **14**, 4053–4058.
17. Ziólkowska, I., Mosor, M. and Nowak, J. (2006) Regional distribution of heterozygous 657del5 mutation carriers of the NBS1 gene in Wielkopolska province (Poland). *J. Appl. Genet.*, **47**, 269–272.
18. Seemanová, E., Jarolim, P., Seeman, P., Varon, R., Digweed, M., Swift, M. and Sperling, K. (2007) Cancer risk of heterozygotes with the NBN founder mutation. *J. Natl Cancer Inst.*, **99**, 1875–1880.
19. Hama, S., Matsuura, S., Tauchi, H., *et al.* (2000) Absence of mutations in the NBS1 gene in B-cell malignant lymphoma patients. *Anticancer Res.*, **20**, 1897–1900.
20. Medina, P. P., Ahrendt, S. A., Pollan, M., Fernandez, P., Sidransky, D. and Sanchez-Cespedes, M. (2003) Screening of homologous recombination gene polymorphisms in lung cancer patients reveals an association

- of the NBS1-185Gln variant and p53 gene mutations. *Cancer Epidemiol. Biomarkers Prev.*, **12**, 699–704.
21. Mohrenweiser, H. W., Xi, T., Vázquez-Matías, J. and Jones, I. M. (2002) Identification of 127 amino acid substitution variants in screening 37 DNA repair genes in humans. *Cancer Epidemiol. Biomarkers Prev.*, **11**, 1054–1064.
  22. Rischewski, J., Bismarck, P., Kabisch, H., Janka-Schaub, G., Obser, T. and Schneppenheim, R. (2000) The common deletion 657del5 in the Nibrin gene is not a major risk factor for B or T cell non-Hodgkin lymphoma in a pediatric population. *Leukemia*, **14**, 1528–1529.
  23. Cao, A. Y., Hu, Z., Yin, W. J., Jin, W. and Shao, Z. M. (2010) Some common mutations of RAD50 and NBS1 in western populations do not contribute significantly to Chinese non-*BRCA1/2* hereditary breast cancer. *Breast Cancer Res. Treat.*, **121**, 247–249.
  24. Schuetz, J. M., MacArthur, A. C., Leach, S., Lai, A. S., Gallagher, R. P., Connors, J. M., Gascoyne, R. D., Spinelli, J. J. and Brooks-Wilson, A. R. (2009) Genetic variation in the NBS1, MRE11, RAD50 and BLM genes and susceptibility to non-Hodgkin lymphoma. *BMC Med. Genet.*, **10**, 117.
  25. Heikkinen, K., Rapakko, K., Karppinen, S. M., et al. (2006) RAD50 and NBS1 are breast cancer susceptibility genes associated with genomic instability. *Carcinogenesis*, **27**, 1593–1599.
  26. Yang, L., Li, Y., Cheng, M., et al. (2012) A functional polymorphism at microRNA-629-binding site in the 3'-untranslated region of NBS1 gene confers an increased risk of lung cancer in Southern and Eastern Chinese population. *Carcinogenesis*, **33**, 338–347.
  27. Huang, M. D., Chen, X. F., Xu, G., Wu, Q. Q., Zhang, J. H., Chen, G. F., Cai, Y. and Qi, F. Z. (2012) Genetic variation in the NBS1 gene is associated with hepatic cancer risk in a Chinese population. *DNA Cell Biol.*, **31**, 678–682.
  28. Zheng, J., Zhang, C., Jiang, L., You, Y., Liu, Y., Lu, J. and Zhou, Y. (2011) Functional NBS1 polymorphism is associated with occurrence and advanced disease status of nasopharyngeal carcinoma. *Mol. Carcinog.*, **50**, 689–696.
  29. Gil, J., Ramsey, D., Stembalska, A., Karpinski, P., Pesz, K. A., Laczmanska, I., Leszczynski, P., Grzebieniak, Z. and Sasiadek, M. M. (2012) The C/A polymorphism in intron 11 of the XPC gene plays a crucial role in the modulation of an individual's susceptibility to sporadic colorectal cancer. *Mol. Biol. Rep.*, **39**, 527–534.
  30. Jiang, L., Liang, J., Jiang, M., Yu, X., Zheng, J., Liu, H., Wu, D. and Zhou, Y. (2011) Functional polymorphisms in the NBS1 gene and acute lymphoblastic leukemia susceptibility in a Chinese population. *Eur. J. Haematol.*, **86**, 199–205.
  31. Jelonek, K., Gdowicz-Klosok, A., Pietrowska, M., Borkowska, M., Korfanty, J., Rzeszowska-Wolny, J. and Widlak, P. (2010) Association between single-nucleotide polymorphisms of selected genes involved in the response to DNA damage and risk of colon, head and neck, and breast cancers in a Polish population. *J. Appl. Genet.*, **51**, 343–352.
  32. Park, S. L., Bastani, D., Goldstein, B. Y., et al. (2010) Associations between NBS1 polymorphisms, haplotypes and smoking-related cancers. *Carcinogenesis*, **31**, 1264–1271.
  33. Silva, S. N., Tomar, M., Paulo, C., Gomes, B. C., Azevedo, A. P., Teixeira, V., Pina, J. E., Rueff, J. and Gaspar, J. F. (2010) Breast cancer risk and common single nucleotide polymorphisms in homologous recombination DNA repair pathway genes XRCC2, XRCC3, NBS1 and RAD51. *Cancer Epidemiol.*, **34**, 85–92.
  34. Ciara, E., Piekutowska-Abramczuk, D., Popowska, E., et al. (2010) Heterozygous germ-line mutations in the NBN gene predispose to medulloblastoma in pediatric patients. *Acta Neuropathol.*, **119**, 325–334.
  35. Bastos, H. N., Antão, M. R., Silva, S. N., et al. (2009) Association of polymorphisms in genes of the homologous recombination DNA repair pathway and thyroid cancer risk. *Thyroid*, **19**, 1067–1075.
  36. Loizidou, M. A., Cariolou, M. A., Neuhausen, S. L., et al. (2010) Genetic variation in genes interacting with *BRCA1/2* and risk of breast cancer in the Cypriot population. *Breast Cancer Res. Treat.*, **121**, 147–156.
  37. Desjardins, S., Beauparlant, J. C., Labrie, Y., Ouellette, G. and Durocher, F.; INHERIT BRCA. (2009) Variations in the NBN/NBS1 gene and the risk of breast cancer in non-*BRCA1/2* French Canadian families with high risk of breast cancer. *BMC Cancer*, **9**, 181.
  38. Margulis, V., Lin, J., Yang, H., Wang, W., Wood, C. G. and Wu, X. (2008) Genetic susceptibility to renal cell carcinoma: the role of DNA double-strand break repair pathway. *Cancer Epidemiol. Biomarkers Prev.*, **17**, 2366–2373.
  39. Smith, T. R., Levine, E. A., Freimanis, R. I., Akman, S. A., Allen, G. O., Hoang, K. N., Liu-Mares, W. and Hu, J. J. (2008) Polygenic model of DNA repair genetic polymorphisms in human breast cancer risk. *Carcinogenesis*, **29**, 2132–2138.
  40. Choudhury, A., Elliott, F., Iles, M. M., Churchman, M., Bristow, R. G., Bishop, D. T. and Kiltie, A. E. (2008) Analysis of variants in DNA damage signalling genes in bladder cancer. *BMC Med. Genet.*, **9**, 69.
  41. Roznowski, K., Januszkiewicz-Lewandowska, D., Mosor, M., Pernak, M., Litwiniuk, M. and Nowak, J. (2008) I171V germline mutation in the NBS1 gene significantly increases risk of breast cancer. *Breast Cancer Res. Treat.*, **110**, 343–348.
  42. Ziółkowska, I., Mosor, M., Wierzbička, M., Rydzanicz, M., Pernak-Schwarz, M. and Nowak, J. (2007) Increased risk of larynx cancer in heterozygous carriers of the I171V mutation of the NBS1 gene. *Cancer Sci.*, **98**, 1701–1705.
  43. Figueroa, J. D., Malats, N., Rothman, N., et al. (2007) Evaluation of genetic variation in the double-strand break repair pathway and bladder cancer risk. *Carcinogenesis*, **28**, 1788–1793.
  44. Lu, J., Wei, Q., Bondy, M. L., et al. (2006) Polymorphisms and haplotypes of the NBS1 gene are associated with risk of sporadic breast cancer in non-Hispanic white women <or=55 years. *Carcinogenesis*, **27**, 2209–2216.
  45. Hebbing, S. J., Fredriksson, H., White, K. A., et al. (2006) Role of the Nijmegen breakage syndrome 1 gene in familial and sporadic prostate cancer. *Cancer Epidemiol. Biomarkers Prev.*, **15**, 935–938.
  46. Zhang, L., Zhang, Z. and Yan, W. (2005) Single nucleotide polymorphisms for DNA repair genes in breast cancer patients. *Clin. Chim. Acta.*, **359**, 150–155.
  47. Auranen, A., Song, H., Waterfall, C., et al. (2005) Polymorphisms in DNA repair genes and epithelial ovarian cancer risk. *Int. J. Cancer*, **117**, 611–618.
  48. Lan, Q., Shen, M., Berndt, S. I., et al. (2005) Smoky coal exposure, NBS1 polymorphisms, p53 protein accumulation, and lung cancer risk in Xuan Wei, China. *Lung Cancer*, **49**, 317–323.
  49. Festa, F., Kumar, R., Sanyal, S., et al. (2005) Basal cell carcinoma and variants in genes coding for immune response, DNA repair, folate and iron metabolism. *Mutat. Res.*, **574**, 105–111.
  50. Sanyal, S., Festa, F., Sakano, S., et al. (2004) Polymorphisms in DNA repair and metabolic genes in bladder cancer. *Carcinogenesis*, **25**, 729–734.
  51. Kuschel, B., Auranen, A., McBride, S., et al. (2002) Variants in DNA double-strand break repair genes and breast cancer susceptibility. *Hum. Mol. Genet.*, **11**, 1399–1407.
  52. Bogdanova, N., Feshchenko, S., Schürmann, P., et al. (2008) Nijmegen Breakage Syndrome mutations and risk of breast cancer. *Int. J. Cancer*, **122**, 802–806.
  53. Steffen, J., Nowakowska, D., Niwińska, A., Czupczak, D., Kluska, A., Piatkowska, M., Wiśniewska, A. and Paszko, Z. (2006) Germline mutations 657del5 of the NBS1 gene contribute significantly to the incidence of breast cancer in Central Poland. *Int. J. Cancer*, **119**, 472–475.
  54. Steffen, J., Varon, R., Mosor, M., et al. (2004) Increased cancer risk of heterozygotes with NBS1 germline mutations in Poland. *Int. J. Cancer*, **111**, 67–71.
  55. Górski, B., Debniak, T., Masojć, B., et al. (2003) Germline 657del5 mutation in the NBS1 gene in breast cancer patients. *Int. J. Cancer*, **106**, 379–381.
  56. Górski, B., Cybulski, C., Huzarski, T., et al. (2005) Breast cancer predisposing alleles in Poland. *Breast Cancer Res. Treat.*, **92**, 19–24.
  57. Buslov, K. G., Iyevleva, A. G., Chekmariova, E. V., et al. (2005) NBS1 657del5 mutation may contribute only to a limited fraction of breast cancer cases in Russia. *Int. J. Cancer*, **114**, 585–589.
  58. Carlomagno, F., Chang-Claude, J., Dunning, A. M. and Ponder, B. A. (1999) Determination of the frequency of the common 657Del5 Nijmegen breakage syndrome mutation in the German population: no association with risk of breast cancer. *Genes Chromosomes Cancer*, **25**, 393–395.
  59. Bogdanova, N., Schürmann, P., Waltes, R., Feshchenko, S., Zalutsky, I. V., Bremer, M. and Dörk, T. (2008) NBS1 variant I171V and breast cancer risk. *Breast Cancer Res. Treat.*, **112**, 75–79.
  60. Broberg, K., Björk, J., Paulsson, K., Höglund, M. and Albin, M. (2005) Constitutional short telomeres are strong genetic susceptibility markers for bladder cancer. *Carcinogenesis*, **26**, 1263–1271.
  61. Pardini, B., Naccarati, A., Novotny, J., et al. (2008) DNA repair genetic polymorphisms and risk of colorectal cancer in the Czech Republic. *Mutat. Res.*, **638**, 146–153.
  62. Li, N., Xu, Y., Zheng, J., Jiang, L., You, Y., Wu, H., Li, W., Wu, D. and Zhou, Y. (2013) NBS1 rs1805794G>C polymorphism is associated with decreased risk of acute myeloid leukemia in a Chinese population. *Mol. Biol. Rep.*, **40**, 3749–3756.
  63. Wu, X., Gu, J., Grossman, H. B., et al. (2006) Bladder cancer predisposition: a multigenic approach to DNA-repair and cell-cycle-control genes. *Am. J. Hum. Genet.*, **78**, 464–479.
  64. Chrzanowska, K. H., Piekutowska-Abramczuk, D., Popowska, E., et al. (2006) Carrier frequency of mutation 657del5 in the NBS1 gene in a

- population of Polish pediatric patients with sporadic lymphoid malignancies. *Int. J. Cancer*, **118**, 1269–1274.
65. Soucek, P., Gut, I., Trneny, M., Skovlund, E., Grenaker Alnaes, G., Kristensen, T., Børresen-Dale, A. L. and Kristensen, V. N. (2003) Multiplex single-tube screening for mutations in the Nijmegen Breakage Syndrome (NBS1) gene in Hodgkin's and non-Hodgkin's lymphoma patients of Slavic origin. *Eur. J. Hum. Genet.*, **11**, 416–419.
  66. Resnick, I. B., Kondratenko, I., Pashanov, E., *et al.* (2003) 657del5 mutation in the gene for Nijmegen breakage syndrome (NBS1) in a cohort of Russian children with lymphoid tissue malignancies and controls. *Am. J. Med. Genet. A*, **120A**, 174–179.
  67. Mosor, M., Ziółkowska, I., Pernak-Schwarz, M., Januszkievicz-Lewandowska, D. and Nowak, J. (2006) Association of the heterozygous germline I171V mutation of the NBS1 gene with childhood acute lymphoblastic leukemia. *Leukemia*, **20**, 1454–1456.
  68. Rollinson, S., Kesby, H. and Morgan, G. J. (2006) Haplotypic variation in MRE11, RAD50 and NBS1 and risk of non-Hodgkin's lymphoma. *Leuk. Lymphoma*, **47**, 2567–2583.
  69. Varon, R., Reis, A., Henze, G., von Einsiedel, H. G., Sperling, K. and Seeger, K. (2001) Mutations in the Nijmegen Breakage Syndrome gene (NBS1) in childhood acute lymphoblastic leukemia (ALL). *Cancer Res.*, **61**, 3570–3572.
  70. Cybulski, C., Górski, B., Debnia, T., *et al.* (2004) NBS1 is a prostate cancer susceptibility gene. *Cancer Res.*, **64**, 1215–1219.
  71. Kanka, C., Brozek, I., Skalska, B., Siemiatkowska, A. and Limon, J. (2007) Germline NBS1 mutations in families with aggregation of breast and/or ovarian cancer from north-east Poland. *Anticancer Res.*, **27**, 3015–3018.
  72. Nowak, J., Mosor, M., Ziółkowska, I., *et al.* (2008) Heterozygous carriers of the I171V mutation of the NBS1 gene have a significantly increased risk of solid malignant tumours. *Eur. J. Cancer*, **44**, 627–630.
  73. Piekutowska-Abramczuk, D., Ciara, E., Popowska, E., *et al.* (2010) The frequency of NBN molecular variants in pediatric astrocytic tumors. *J. Neurooncol.*, **96**, 161–168.
  74. Han, J., Haiman, C., Niu, T., Guo, Q., Cox, D. G., Willett, W. C., Hankinson, S. E. and Hunter, D. J. (2009) Genetic variation in DNA repair pathway genes and premenopausal breast cancer risk. *Breast Cancer Res. Treat.*, **115**, 613–622.
  75. Teo, M. T., Landi, D., Taylor, C. F., *et al.* (2012) The role of microRNA-binding site polymorphisms in DNA repair genes as risk factors for bladder cancer and breast cancer and their impact on radiotherapy outcomes. *Carcinogenesis*, **33**, 581–586.
  76. Debnia, T., Górski, B., Cybulski, C., *et al.* (2003) Germline 657del5 mutation in the NBS1 gene in patients with malignant melanoma of the skin. *Melanoma Res.*, **13**, 365–370.
  77. Steffen, J., Maneva, G., Popławska, L., Varon, R., Mioduszewska, O. and Sperling, K. (2006) Increased risk of gastrointestinal lymphoma in carriers of the 657del5 NBS1 gene mutation. *Int. J. Cancer*, **119**, 2970–2973.
  78. Mosor, M., Ziółkowska, I., Januszkievicz-Lewandowska, D. and Nowak, J. (2008) Polymorphisms and haplotypes of the NBS1 gene in childhood acute leukaemia. *Eur. J. Cancer*, **44**, 2226–2232.
  79. Mateju, M., Kleiblova, P., Kleibl, Z., Janatova, M., Soukupova, J., Ticha, I., Novotny, J. and Pohlreich, P. (2012) Germline mutations 657del5 and 643C>T (R215W) in NBN are not likely to be associated with increased risk of breast cancer in Czech women. *Breast Cancer Res. Treat.*, **133**, 809–811.
  80. Huang, J., Zhao, Y., Li, Q., Zhang, J., Wang, Y. and Zhang, B. (2012) Association of single nucleotide polymorphisms of NBS1 gene with genetic susceptibility to primary liver cancer in a Chinese Han Population. *Prog. Biochem. Biophys.*, **39**, 678–686.
  81. Qiu, Y., Lin, Y., Huang, M., Chen, X., He, F., Fan, L., Chen, B. and Cai, L. (2011) Association of smoking, residential environment and polymorphisms with lung cancer. *J. Environ. Occup. Med.*, **28**, 133–136+140.
  82. Fan, L. H., Chen, J. L. and Cai, L. (2010) [Study on the association between DNA double-strand break repair gene NBS1 polymorphisms and susceptibility on lung cancer]. *Zhonghua Liu Xing Bing Xue Za Zhi*, **31**, 213–217.
  83. Attia, J., Thakkestian, A. and D'Este, C. (2003) Meta-analyses of molecular association studies: methodologic lessons for genetic epidemiology. *J. Clin. Epidemiol.*, **56**, 297–303.
  84. Bender, R. and Lange, S. (2001) Adjusting for multiple testing—when and how? *J. Clin. Epidemiol.*, **54**, 343–349.
  85. Bland, J. M. and Altman, D. G. (1995) Multiple significance tests: the Bonferroni method. *BMJ*, **310**, 170.
  86. Sankoh, A. J., Huque, M. F. and Dubey, S. D. (1997) Some comments on frequently used multiple endpoint adjustment methods in clinical trials. *Stat. Med.*, **16**, 2529–2542.
  87. Krüger, L., Demuth, I., Neitzel, H., Varon, R., Sperling, K., Chrzanowska, K. H., Seemanova, E. and Digweed, M. (2007) Cancer incidence in Nijmegen breakage syndrome is modulated by the amount of a variant NBS protein. *Carcinogenesis*, **28**, 107–111.
  88. Kinzler, K. W. and Vogelstein, B. (1997) Cancer-susceptibility genes. Gatekeepers and caretakers. *Nature*, **386**, 761, 763.
  89. Kang, J., Ferguson, D., Song, H., Bassing, C., Eckersdorff, M., Alt, F. W. and Xu, Y. (2005) Functional interaction of H2AX, NBS1, and p53 in ATM-dependent DNA damage responses and tumor suppression. *Mol. Cell. Biol.*, **25**, 661–670.
  90. Dumon-Jones, V., Frappart, P. O., Tong, W. M., Sajithlal, G., Hulla, W., Schmid, G., Herceg, Z., Digweed, M. and Wang, Z. Q. (2003) Nbn heterozygosity renders mice susceptible to tumor formation and ionizing radiation-induced tumorigenesis. *Cancer Res.*, **63**, 7263–7269.
  91. Diflippantonio, S., Celeste, A., Fernandez-Capetillo, O., *et al.* (2005) Role of Nbs1 in the activation of the Atm kinase revealed in humanized mouse models. *Nat. Cell Biol.*, **7**, 675–685.
  92. Zhang, Z. H., Yang, L. S., Huang, F., Hao, J. H., Su, P. Y. and Sun, Y. H. (2012) Current evidence on the relationship between two polymorphisms in the NBS1 gene and breast cancer risk: a meta-analysis. *Asian Pac. J. Cancer Prev.*, **13**, 5375–5379.
  93. di Masi, A., Viganotti, M., Polticelli, F., Ascenzi, P., Tanzarella, C. and Antocchia, A. (2008) The R215W mutation in NBS1 impairs gamma-H2AX binding and affects DNA repair: molecular bases for the severe phenotype of 657del5/R215W Nijmegen breakage syndrome patients. *Biochem. Biophys. Res. Commun.*, **369**, 835–840.
  94. Comings, D. E. and MacMurray, J. P. (2000) Molecular heterosis: a review. *Mol. Genet. Metab.*, **71**, 19–31.
  95. Salinas-Sánchez, A. S., Donate-Moreno, M. J., López-Garrido, M. P., Giménez-Bachs, J. M. and Escribano, J. (2012) Role of CYP1B1 gene polymorphisms in bladder cancer susceptibility. *J. Urol.*, **187**, 700–706.
  96. Yager, J. D. (2000) Endogenous estrogens as carcinogens through metabolic activation. *J. Natl Cancer Inst.*, **27**, 67–73.
  97. Hsu, H. M., Wang, H. C., Chen, S. T., Hsu, G. C., Shen, C. Y. and Yu, J. C. (2007) Breast cancer risk is associated with the genes encoding the DNA double-strand break repair Mre11/Rad50/Nbs1 complex. *Cancer Epidemiol. Biomarkers Prev.*, **16**, 2024–2032.
  98. Sanchez-Cespedes, M., Ahrendt, S. A., Piantadosi, S., *et al.* (2001) Chromosomal alterations in lung adenocarcinoma from smokers and non-smokers. *Cancer Res.*, **61**, 1309–1313.
  99. Haruki, N., Harano, T., Masuda, A., *et al.* (2001) Persistent increase in chromosome instability in lung cancer: possible indirect involvement of p53 inactivation. *Am. J. Pathol.*, **159**, 1345–1352.
  100. Thompson, S. G. (1994) Why sources of heterogeneity in meta-analysis should be investigated. *BMJ*, **309**, 1351–1355.
